# Supplementary material
Source: publisher site journal article supplement (https://www.spandidos-publications.com/2602/downloadSupplementary)
Supplement: Supplementary file 1 [file downloadSupplementary]

## Sheet: Table SI
Table SI. Network analysis results of miRNA-mRNA co-expression networks.
Name	Class	Edge count	Average shortest path length	Betweenness centrality	Closeness centrality	Clustering coefficient	Eccentricity	Neighborhood connectivity	Indegree	Outdegree
miR150	miRNA	326	1.63652	7.99e-05	0.611052	0.00438266	3	4.86335	5	321
miR139	miRNA	316	1.43775	0	0.695531	0.000995	3	3.67089	0	316
miR155	miRNA	291	1.50087	5.9e-05	0.66628	0.00595746	2	6.07317	4	287
miR141	miRNA	201	1.43202	3.52e-05	0.698312	0.00223339	3	4.32663	3	198
miR4772	miRNA	179	1.89391	6.14e-05	0.528007	0.0131691	3	8.19429	6	173
miR378a	miRNA	176	4.20463	0.00130355	0.237833	0.00188197	11	6.72254	3	173
miR21	miRNA	175	1	5.98e-06	1	0.00203612	1	5.39429	1	174
miR200c	miRNA	131	1.79758	2.36e-05	0.556303	0.00441264	4	5.51538	4	127
miR22	miRNA	118	1.15217	0.000257	0.867925	7.37e-05	2	6.11111	1	117
miR142	miRNA	116	1.98957	8.05e-06	0.502622	0.0225225	3	11.7411	4	112
miR944	miRNA	116	1	0	1	0	1	5.71552	0	116
miR146b	miRNA	113	1	4.52e-05	1	0.000948	1	9.57522	2	111
miR148a	miRNA	111	1	0	1	0	1	6.61261	0	111
miR1-2	miRNA	108	1.5354	8.27e-06	0.651297	0.0104396	2	9.38095	3	105
miR449a	miRNA	106	1	0	1	0	1	2.08491	0	106
miR133a-1	miRNA	105	1.54867	6.58e-06	0.645714	0.0122306	2	9.62745	3	102
miR378c	miRNA	104	4.29472	0.000253	0.232844	0.00513992	11	9.01942	1	103
miR499a	miRNA	103	1	0	1	0	1	6.66019	0	103
miR1-1	miRNA	100	1.5708	6.6e-06	0.63662	0.0123497	2	9.83505	3	97
miR133a-2	miRNA	99	1.57522	6.58e-06	0.634831	0.0126097	2	10.0625	3	96
miR95	miRNA	98	1	0	1	0	1	6.88776	0	98
miR934	miRNA	95	3.76448	0.00226054	0.265641	0.00430005	9	3.33696	4	91
miR342	miRNA	95	1	0	1	0	1	6.70526	0	95
miR2115	miRNA	86	1	0	1	0	1	1.45349	0	86
miR486-2	miRNA	84	1.46711	1.13e-05	0.681614	0.00493827	2	5.32099	3	81
miR486-1	miRNA	82	1.48684	1.34e-05	0.672566	0.0118468	2	9.10127	4	78
miR183	miRNA	81	1.25472	8.06e-06	0.796992	0.00129828	2	3.94937	2	79
miR146a	miRNA	78	1.88	2.21e-05	0.531915	0.0385043	3	18.0405	4	74
miR205	miRNA	73	1	0	1	0	1	5.41096	0	73
miR190b	miRNA	65	4.43629	0.00165819	0.225413	0.0047123	11	7.71875	3	62
miR3614	miRNA	63	1.24691	7.62e-06	0.80198	0.00082	2	1.78689	2	61
miR203a	miRNA	62	1.11594	3.23e-06	0.896104	0.000546	2	2.83607	1	61
miR18a	miRNA	61	4.12227	0.00143932	0.242585	0.00730567	7	3.83051	4	57
miR3607	miRNA	61	8.152	0.000774	0.122669	0.000627	13	4.38596	5	56
miR92b	miRNA	57	1	0	1	0	1	3.2807	0	57
miR10b	miRNA	56	1	0	1	0	1	4.16071	0	56
miR200a	miRNA	56	1.83988	9.74e-06	0.543514	0.0159652	2	11.9057	3	53
miR577	miRNA	53	3.89704	0.00243014	0.256605	0.0114286	8	7.02	6	47
miR17	miRNA	53	3.88031	0.00176737	0.257711	0.0202899	7	5.32609	8	45
miR140	miRNA	53	3.30031	3.61e-06	0.303002	0.000377	5	2.94231	1	52
miR151a	miRNA	50	1	0	1	0	1	2.26	0	50
miR5698	miRNA	48	1	0	1	0	1	7.33333	0	48
miR99a	miRNA	46	10.0786	5.41e-05	0.0992202	0.0162602	19	4.78571	4	42
miR194-2	miRNA	46	1.55682	2.67e-06	0.642336	0.0147992	3	7.13636	2	44
miR3651	miRNA	43	1	1.56e-06	1	0.00775194	1	6.2093	1	42
miR7702	miRNA	42	2.78261	3.1e-06	0.359375	0.0493612	4	18.881	3	39
miR196b	miRNA	42	8.83045	0.00208164	0.113245	0	15	4.7619	1	41
miR192	miRNA	41	1.55682	2.67e-06	0.642336	0.0276653	2	8.28205	2	39
miR429	miRNA	41	1.88218	6.14e-06	0.5313	0.0269905	2	14.2051	2	39
miR196a-1	miRNA	41	1.50633	2.72e-06	0.663866	0.0148448	2	5.35897	2	39
miR194-1	miRNA	40	1.625	2.14e-06	0.615385	0.0199146	3	7.18421	2	38
miR4491	miRNA	39	1	0	1	0	1	3.25641	0	39
miR101-2	miRNA	39	2.76163	6.17e-06	0.362105	0.00975976	6	5.05405	2	37
miR365a	miRNA	39	1.44776	3.64e-06	0.690722	0.00375375	2	5.35135	2	37
miR30e	miRNA	38	1	0	1	0	1	7.07895	0	38
let-7c	miRNA	38	10.0569	0.000238	0.0994339	0.0196078	19	6.44118	5	33
miR218-1	miRNA	38	11.065	0.000191	0.0903753	0.00952381	20	4.22222	2	36
miR196a-2	miRNA	38	1.5443	2.47e-06	0.647541	0.0166667	2	6.38889	2	36
miR106b	miRNA	37	4.49292	0.000243	0.222572	0.0031746	9	3.63889	1	36
miR193a	miRNA	37	1	0	1	0	1	5.13514	0	37
miR379	miRNA	36	9.16832	0.000659	0.109071	0.0628079	18	11.931	7	29
miR204	miRNA	36	10.1349	0.000319	0.098669	0.00356506	19	4.73529	3	33
miR31	miRNA	36	1	0	1	0	1	2.44444	0	36
miR222	miRNA	36	1.43548	1.84e-06	0.696629	0.00084	2	6.22857	1	35
miR508	miRNA	35	1.7125	4.47e-06	0.583942	0.0403226	3	8.1875	3	32
miR4449	miRNA	35	1	9.5e-07	1	0.0142857	1	7.02857	1	34
miR542	miRNA	35	1.64912	8.06e-06	0.606383	0.00604839	4	4.96875	3	32
miR4728	miRNA	35	1	0	1	0	1	1.85714	0	35
miR101-1	miRNA	35	2.78488	5.12e-06	0.359081	0.0123106	6	5.87879	2	33
miR218-2	miRNA	35	12.0309	3.86e-05	0.083119	0.0106952	21	4	1	34
miR103a-1	miRNA	35	5.21493	0.000279	0.191757	0.00757576	9	4.36364	2	33
miR758	miRNA	34	9.24814	0.000347	0.10813	0.108696	18	11.5	10	24
miR27b	miRNA	33	1.7027	8.72e-06	0.587302	0.00985222	3	5.27586	4	29
miR509-2	miRNA	33	1.775	4.79e-06	0.56338	0.0689655	3	9.41379	5	28
miR127	miRNA	32	9.1448	0.00037	0.109352	0.102564	18	12.2593	7	25
miR3652	miRNA	32	1.34694	0	0.742424	0.0171371	2	7.28125	0	32
miR1248	miRNA	32	1.46667	0	0.681818	0.0141129	2	7.375	0	32
miR29c	miRNA	31	2.29651	2.9e-05	0.435443	0.0128205	5	7.74074	4	27
miR199a-1	miRNA	31	9.10087	0.000754	0.10988	0.0356125	17	8.74074	7	24
miR100	miRNA	30	10.0792	4.2e-05	0.0992142	0.0307692	19	6.96154	4	26
miR335	miRNA	30	1	0	1	0	1	4.1	0	30
miR615	miRNA	30	1.64557	2.25e-06	0.607692	0.0171958	2	6.10714	2	28
miR221	miRNA	30	1.53226	1.5e-06	0.652632	0.00123153	2	3.86207	1	29
miR10a	miRNA	30	1	0	1	0	1	4.23333	0	30
miR6516	miRNA	30	1	0	1	0	1	6.93333	0	30
miR30d	miRNA	29	2.22667	5.34e-06	0.449102	0.00396825	4	3.39286	1	28
miR532	miRNA	29	1.85882	0.000212	0.537975	0.0333333	3	5.64	5	24
miR514a-1	miRNA	29	1.8	3.19e-06	0.555556	0.0633333	3	9.72	4	25
miR660	miRNA	28	2.05882	0.000213	0.485714	0.0181159	4	5.58333	5	23
miR134	miRNA	28	8.68812	0.000655	0.1151	0.0676923	17	10.9231	6	22
miR514a-2	miRNA	28	1.725	5.83e-06	0.57971	0.0865801	2	10.5909	6	22
miR199a-2	miRNA	28	8.83416	0.000339	0.113197	0.0471015	17	9.70833	5	23
miR514a-3	miRNA	28	1.85	3.93e-06	0.540541	0.0866667	3	10.32	5	23
miR181b-1	miRNA	28	1.54545	2.74e-06	0.647059	0.025	2	7.08	3	25
miR365b	miRNA	28	1.61194	2.34e-06	0.62037	0.00923077	2	5.96154	2	26
miR382	miRNA	27	8.67698	0.000874	0.115247	0.0822511	17	11.5909	5	22
miR3913-1	miRNA	27	1.13333	6.7e-07	0.882353	0.02	2	2.80769	1	26
miR153-2	miRNA	27	8.95226	6.35e-05	0.111704	0.0123077	14	4.38462	1	26
miR452	miRNA	27	5.10811	0.000227	0.195767	0.005	12	13.6	3	24
miR708	miRNA	26	1.83333	0.0003	0.545455	0.00666667	2	10.2	3	23
miR181a-1	miRNA	26	1.58182	2.22e-06	0.632184	0.0355731	2	5.6087	3	23
miR200b	miRNA	26	2.31118	3.87e-06	0.43268	0.0380435	3	20.5833	3	23
miR103a-2	miRNA	26	5.21364	0.000115	0.191804	0.015	9	5.48	1	25
miR145	miRNA	25	3.51961	0.000364	0.284123	0.00166667	6	5	3	22
miR3065	miRNA	25	1	0	1	0	1	2.56	0	25
miR125b-2	miRNA	25	9.99319	0.000307	0.100068	0.0666667	19	11.9524	5	20
miR144	miRNA	25	1.85526	3.69e-06	0.539007	0.021645	2	11.0455	3	22
miR26a-2	miRNA	25	1.8125	0.000168	0.551724	0.025974	3	6.86364	3	22
miR26a-1	miRNA	25	2.075	0.000102	0.481928	0.0238095	4	7.22727	4	21
miR135b	miRNA	24	4.30631	6.4e-05	0.232218	0.030303	9	8.77273	2	22
miR191	miRNA	24	1.25806	1.17e-06	0.794872	0.00197628	2	6.43478	1	23
miR30b	miRNA	24	1.92	9.82e-06	0.520833	0.0108225	3	4.68182	2	22
miR664b	miRNA	24	1.425	1.22e-06	0.701754	0	2	5.86957	1	23
miR215	miRNA	24	1	1.03e-06	1	0.0199275	1	8.58333	1	23
miR381	miRNA	23	10.0124	2.93e-05	0.0998764	0.0818713	19	11.2632	6	17
miR584	miRNA	23	4.69369	0.0002	0.213052	0.0197628	10	21.4783	3	20
miR1266	miRNA	23	1	0	1	0	1	3.04348	0	23
miR628	miRNA	23	7.48622	0.00284442	0.133579	0.0131579	12	6.95	4	19
miR199b	miRNA	23	8.58601	0.00208171	0.116468	0.068421	16	11.5	5	18
miR182	miRNA	23	1.80189	1.78e-06	0.554974	0.0142857	2	7.42857	2	21
miR6510	miRNA	23	1	0	1	0	1	3.95652	0	23
miR654	miRNA	22	9.86943	7.81e-05	0.101323	0.0661765	19	12.1176	6	16
miR27a	miRNA	22	1.90541	4.8e-06	0.524823	0.0392157	3	6.38889	4	18
miR4714	miRNA	22	1	0	1	0	1	2.59091	0	22
miR26b	miRNA	22	1.125	7.99e-05	0.888889	0.004329	2	6.86364	1	21
miR30a	miRNA	22	2.62667	3.67e-06	0.380711	0.00789474	4	4.2	2	20
miR34c	miRNA	22	1.38235	8.3e-07	0.723404	0.0119048	2	4	1	21
miR337	miRNA	21	9.87624	0.000349	0.101253	0.0467836	19	11.0526	6	15
miR4724	miRNA	21	1.80247	1.78e-06	0.554795	0.00789474	3	5.8	1	20
miR423	miRNA	21	1	0	1	0	1	2.47619	0	21
miR410	miRNA	21	10.1009	0.00012	0.0990014	0.125	19	11	6	15
miR769	miRNA	21	1	2.22e-06	1	0	1	6.33333	1	20
miR411	miRNA	21	10.0365	0.000316	0.0996362	0.133987	19	12.6667	5	16
miR937	miRNA	21	1.20833	9.22e-05	0.827586	0.00526316	2	3.6	2	19
miR509-1	miRNA	21	2.1125	2.06e-06	0.473373	0.0882353	3	9.88889	4	17
miR125b-1	miRNA	21	9.24319	0.000584	0.108188	0.0625	18	12.8125	5	16
miR675	miRNA	21	1.36667	4.34e-05	0.731707	0	2	4	2	19
let-7a-3	miRNA	21	1.64444	4.37e-05	0.608108	0.0875	2	6.125	5	16
miR598	miRNA	21	1	0	1	0	1	3.28571	0	21
miR551b	miRNA	20	1	0	1	0	1	4.05	0	20
miR509-3	miRNA	20	2	2.31e-06	0.5	0.0698529	3	9.94118	3	17
miR34a	miRNA	20	1	0	1	0	1	7.4	0	20
miR29a	miRNA	20	2.25	4.91e-05	0.444444	0.00980392	4	6.66667	2	18
miR653	miRNA	20	1.13636	8.9e-07	0.88	0.00584795	2	4.21053	1	19
miR20a	miRNA	20	4.57786	0.00032	0.218443	0.147436	8	9.15385	7	13
miR181a-2	miRNA	20	1.69091	1.71e-06	0.591398	0.0477941	2	6	3	17
miR34b	miRNA	20	1.44118	7.2e-07	0.693878	0.0146199	2	3.68421	1	19
let-7a-1	miRNA	20	1.82222	2.62e-05	0.54878	0.0952381	3	6.13333	5	15
miR9-3	miRNA	20	1.47059	1.42e-06	0.68	0.0228758	2	4.38889	2	18
miR93	miRNA	19	4.36293	0.000802	0.229204	0.025	8	10.75	4	15
miR664a	miRNA	19	1.55	9.5e-07	0.645161	0	2	4.55556	1	18
miR106a	miRNA	19	1.55263	1.33e-06	0.644068	0.0220588	2	4.94118	2	17
miR96	miRNA	19	1.83962	1.33e-06	0.54359	0.0220588	2	9.17647	2	17
miR592	miRNA	19	1	0	1	0	1	2.94737	0	19
miR3913-2	miRNA	19	1.4	2.2e-07	0.714286	0.0424837	2	3.55556	1	18
miR29b-1	miRNA	19	3.06977	2.42e-06	0.325758	0.0330882	6	5.64706	2	17
miR202	miRNA	19	1	0	1	0	1	5.78947	0	19
miR224	miRNA	19	6.06435	6.75e-05	0.164898	0.00326797	13	5.38889	1	18
miR20b	miRNA	19	1.55263	1.42e-06	0.644068	0.0183823	2	5.82353	2	17
miR126	miRNA	18	8.95467	0.000242	0.111674	0.00367647	14	9.23529	1	17
miR328	miRNA	18	8.89384	0.00032	0.112437	0.0166667	14	6.1875	3	15
miR375	miRNA	18	1	8e-05	1	0	1	7.11111	1	17
miR874	miRNA	18	9.86045	5.28e-06	0.101415	0	15	5.52941	1	17
miR3912	miRNA	18	1	0	1	0	1	5.22222	0	18
miR125a	miRNA	18	10.8365	5.73e-06	0.092281	0.00367647	16	5.76471	2	16
miR1269a	miRNA	18	1	0	1	0	1	3.61111	0	18
miR3653	miRNA	18	9.11378	0.000124	0.109724	0	14	8.4375	2	16
miR500a	miRNA	18	2.09412	4.8e-05	0.477528	0.0824176	4	7.5	4	14
miR29b-2	miRNA	18	3.07558	2.39e-06	0.325142	0.0333333	6	5.4375	2	16
miR24-1	miRNA	18	1.94595	2.43e-06	0.513889	0.0619048	3	7.86667	3	15
miR181c	miRNA	18	1.32	8.3e-07	0.757576	0.00367647	2	5.88235	1	17
miR129-2	miRNA	18	1.26087	6.1e-07	0.793103	0.0183823	2	3.29412	1	17
miR149	miRNA	18	1	0	1	0	1	2.83333	0	18
miR143	miRNA	17	1	3.22e-05	1	0	1	5.52941	2	15
miR3605	miRNA	17	8.304	0.00249789	0.120424	0.00952381	13	8.93333	4	13
miR132	miRNA	17	1.38462	6.7e-07	0.722222	0.0125	2	4.8125	1	16
miR23a	miRNA	17	2.2973	3.72e-06	0.435294	0.0476191	3	6.86667	4	13
miR502	miRNA	17	2.34118	0.000259	0.427136	0.0274725	4	6.78571	4	13
miR214	miRNA	17	9.79579	3.71e-05	0.102085	0.0571429	18	8.53333	3	14
miR652	miRNA	17	1	0	1	0	1	3	0	17
miR454	miRNA	17	8.832	4.16e-05	0.113225	0.0125	15	3.75	1	16
miR424	miRNA	17	2.2807	5.12e-06	0.438462	0.0641026	3	5.53846	4	13
miR181b-2	miRNA	17	1.74545	1.17e-06	0.572917	0.0769231	2	8.21429	3	14
miR9-2	miRNA	17	1.55882	8.3e-07	0.641509	0.0476191	2	5.33333	2	15
miR889	miRNA	16	10.1417	0.000205	0.0986027	0.121795	19	11.6154	6	10
miR1295a	miRNA	16	1	0	1	0	1	2.25	0	16
miR320a	miRNA	16	1.60714	1.33e-06	0.622222	0.010989	3	4.92857	2	14
miR6806	miRNA	16	1	0	1	0	1	2.25	0	16
let-7f-1	miRNA	16	1.84444	1.96e-05	0.542169	0.0909091	3	6.75	4	12
miR9-1	miRNA	16	1.58824	8.1e-07	0.62963	0.0494506	2	5.71429	2	14
miR493	miRNA	15	1	2.21e-05	1	0	1	4.8	1	14
miR212	miRNA	15	1.46154	5.6e-07	0.684211	0.0164835	2	3.78571	1	14
miR28	miRNA	15	1	0	1	0	1	3.06667	0	15
miR642a	miRNA	15	1	0	1	0	1	3.8	0	15
miR154	miRNA	15	9.40718	0.000108	0.106302	0.043956	18	9.42857	3	12
miR23b	miRNA	15	2.12162	3.86e-06	0.471338	0	3	6.30769	2	13
let-7d	miRNA	15	7.36916	3.81e-06	0.135701	0.0142857	14	4.46667	1	14
miR19b-1	miRNA	15	4.76705	0.000383	0.209773	0.245455	8	16.4545	5	10
miR885	miRNA	15	1	0	1	0	1	4.4	0	15
miR556	miRNA	15	1	0	1	0	1	4.4	0	15
miR1224	miRNA	15	1	0	1	0	1	3.46667	0	15
miR363	miRNA	15	1.65789	9.7e-07	0.603175	0.0320513	2	6.15385	2	13
miR33a	miRNA	14	3.60714	0.000299	0.277228	0.0384615	6	6.38462	4	10
miR193b	miRNA	14	1.8209	1.03e-06	0.54918	0.0227273	2	6.91667	2	12
miR301a	miRNA	14	7.85689	0.000294	0.127277	0.0727273	14	8	4	10
miR483	miRNA	14	1.6	3.24e-05	0.625	0	2	5.38462	2	12
miR19a	miRNA	14	4.77864	0.00245812	0.209265	0.136364	8	14.7273	4	10
MURC	mRNA	14	0	0	0	0.043956	0	91.7143	14	0
miR409	miRNA	14	9.62871	0.000186	0.103856	0.151515	18	13.5833	6	8
miR4784	miRNA	14	1	0	1	0	1	3.07143	0	14
MYOZ2	mRNA	14	0	0	0	0.021978	0	98.5	14	0
miR299	miRNA	14	1.1875	2.22e-05	0.842105	0.00549451	2	6.78571	1	13
miR501	miRNA	14	2.29412	4.64e-05	0.435897	0.0378788	4	7.33333	2	12
miR376b	miRNA	14	12.8057	1.5e-05	0.0780903	0.0320513	22	7.69231	3	11
miR450b	miRNA	14	1.87719	2.63e-06	0.53271	0.133333	3	8.8	4	10
miR376c	miRNA	13	11.8175	0.000113	0.0846206	0.0545455	21	8.18182	3	10
miR4636	miRNA	13	1	0	1	0	1	4.15385	0	13
miR223	miRNA	13	2.50619	3.21e-05	0.399012	0.0454546	4	47.8333	1	12
ITIH3	mRNA	13	0	0	0	0.0192308	0	29.6923	13	0
miR210	miRNA	13	1	4.2e-05	1	0	1	3.30769	3	10
miR152	miRNA	13	1	2.06e-05	1	0	1	4.30769	1	12
miR539	miRNA	13	10.474	0.000159	0.0954744	0.1	19	11.2727	4	9
miR370	miRNA	13	9.5	3.82e-05	0.105263	0.211111	18	15.3	5	8
miR500b	miRNA	13	2.15294	5.56e-05	0.464481	0.144444	3	11.8	4	9
miR582	miRNA	13	1	0	1	0	1	3.92308	0	13
miR505	miRNA	13	6.487	1e-06	0.154154	0.0454546	13	5.25	1	12
miR450a-2	miRNA	13	1.89474	2.69e-06	0.527778	0.138889	3	9.33333	4	9
miR130b	miRNA	13	6.26133	0.000769	0.15971	0.00757576	12	3.91667	2	11
miR3934	miRNA	13	1	0	1	0	1	2.53846	0	13
miR369	miRNA	13	10.9554	0.000423	0.0912788	0.0909091	20	10.6667	4	9
KCNA7	mRNA	13	0	0	0	0.0512821	0	89.1538	13	0
miR30c-1	miRNA	13	2.18667	7.4e-06	0.457317	0.0333333	3	8.1	3	10
miR451a	miRNA	13	1.93421	9.1e-07	0.517007	0.111111	2	21.2	3	10
miR92a-2	miRNA	13	4.84299	2.74e-05	0.206484	0.166667	8	15.3	5	8
miR92a-1	miRNA	13	4.84299	2.9e-05	0.206484	0.188889	8	10.1	5	8
miR129-1	miRNA	13	1.47826	3.3e-07	0.676471	0.0378788	2	4.66667	1	12
miR590	miRNA	12	5.55822	0.00308946	0.179914	0.0363636	11	7.90909	3	9
miR1976	miRNA	12	1.15385	5.6e-07	0.866667	0	2	2.81818	1	11
miR1296	miRNA	12	1	1.22e-06	1	0	1	3.25	1	11
miR324	miRNA	12	7.23911	0.00021	0.138139	0.0333333	14	7	2	10
miR1306	miRNA	12	6.45867	0.00032	0.154831	0.0181818	13	7.81818	4	8
miR33b	miRNA	12	4.3125	4.65e-05	0.231884	0.0181818	7	6.54545	3	9
SCXB	mRNA	12	0	0	0	0.106061	0	14.8333	12	0
miR5586	miRNA	12	1	2.07e-06	1	0.0227273	1	28.3333	1	11
miR487b	miRNA	12	10.1473	1.36e-05	0.0985486	0.172727	19	13.6364	4	8
miR362	miRNA	12	2.44706	2.92e-05	0.408654	0.138889	4	8.88889	4	8
miR589	miRNA	12	1.35294	5.6e-07	0.73913	0	2	3.36364	1	11
miR195	miRNA	12	2.35	0.000265	0.425532	0.0277778	4	7.88889	3	9
miR3677	miRNA	12	2.21951	1e-06	0.450549	0	3	6.18182	1	11
CAPN3	mRNA	12	0	0	0	0.030303	0	82.75	12	0
miR4662a	miRNA	12	1	0	1	0	1	2.58333	0	12
PITX3	mRNA	12	0	0	0	0.030303	0	98.25	12	0
miR320b-2	miRNA	12	1.64286	7.2e-07	0.608696	0.0777778	2	6.5	2	10
miR450a-1	miRNA	12	1.91228	1.99e-06	0.522936	0.214286	3	9.5	4	8
miR197	miRNA	12	6.39775	3.78e-06	0.156305	0.0363636	13	6.81818	1	11
miR744	miRNA	12	7.43022	2.35e-05	0.134585	0.0151515	14	5.08333	1	11
miR1301	miRNA	12	8.84356	0.000167	0.113077	0.0222222	15	4.3	3	9
miR942	miRNA	12	1	0	1	0	1	3.08333	0	12
miR153-1	miRNA	12	9.94097	1.1e-07	0.100594	0.0727273	15	4.36364	1	11
miR629	miRNA	12	1	0	1	0	1	3.33333	0	12
miR203b	miRNA	12	1.84058	4.4e-07	0.543307	0.0181818	2	9.09091	1	11
miR16-1	miRNA	12	6.87111	0.00265976	0.145537	0.0416667	11	7.11111	3	9
miR323a	miRNA	11	9.68317	0.000115	0.103272	0.155556	18	12.7	6	5
MSMP	mRNA	11	0	0	0	0	0	11.6364	11	0
miR1307	miRNA	11	1.61111	3.69e-05	0.62069	0.0181818	3	3.81818	1	10
miR345	miRNA	11	6.46578	0.000618	0.15466	0.0454546	11	9	1	10
miR495	miRNA	11	12.7011	0.000173	0.0787333	0.0277778	22	9.55556	4	7
miR432	miRNA	11	10.2321	2.93e-06	0.0977321	0.236111	19	14.4444	5	6
miR425	miRNA	11	1.67742	4.4e-07	0.596154	0.0111111	2	7	1	10
miR887	miRNA	11	1	0	1	0	1	3.27273	0	11
miR7-1	miRNA	11	1	4.4e-07	1	0.0181818	1	4.18182	1	10
miR301b	miRNA	11	7.05244	0.000658	0.141795	0.0833333	13	6.11111	4	7
RGAG1	mRNA	11	0	0	0	0	0	21.3636	11	0
miR496	miRNA	11	11.0922	7.05e-06	0.0901534	0.1	20	11.2	3	8
NEB	mRNA	11	0	0	0	0	0	70.8182	11	0
miR4762	miRNA	11	1	0	1	0	1	7	0	11
FBP2	mRNA	11	0	0	0	0.0272727	0	98.2727	11	0
MYOT	mRNA	11	0	0	0	0.0454546	0	117.182	11	0
CYP2E1	mRNA	11	0	0	0	0.0272727	0	56.8182	11	0
miR107	miRNA	11	1	3.16e-05	1	0.0181818	1	5.90909	2	9
AMHR2	mRNA	11	0	0	0	0.0454546	0	30.1818	11	0
CKM	mRNA	11	0	0	0	0.00909091	0	85.2727	11	0
miR7-2	miRNA	11	1.28571	3.3e-07	0.777778	0.0333333	2	4	1	10
TMOD4	mRNA	11	0	0	0	0.0545455	0	77.7273	11	0
miR217	miRNA	11	1.18182	1.61e-06	0.846154	0.0111111	2	9.7	2	9
let-7a-2	miRNA	11	2.28889	9.1e-05	0.436893	0.263889	3	12.4444	5	6
miR19b-2	miRNA	11	4.83912	1.18e-05	0.206649	0.404762	8	14.1429	4	7
miR338	miRNA	11	1	0	1	0	1	3.81818	0	11
miR24-2	miRNA	11	2.04054	1.22e-06	0.490066	0.160714	3	11.25	3	8
miR181d	miRNA	11	1.6	4.4e-07	0.625	0.0111111	2	5.9	1	10
let-7f-2	miRNA	11	2.13333	1.64e-05	0.46875	0.196429	3	7.5	4	7
miR105-1	miRNA	11	1.41176	4.4e-07	0.708333	0.0111111	2	4.3	1	10
let-7b	miRNA	10	2.22222	9.83e-06	0.45	0.107143	3	8.25	2	8
KCNK7	mRNA	10	0	0	0	0.122222	0	35.1	10	0
miR548s	miRNA	10	1	0	1	0	1	4.3	0	10
miR25	miRNA	10	5.4749	0.000233	0.182652	0.0138889	10	8.55556	2	8
PFKM	mRNA	10	0	0	0	0.0888889	0	113.5	10	0
LOC121952	mRNA	10	0	0	0	0.0888889	0	94.9	10	0
FNDC5	mRNA	10	0	0	0	0.0666667	0	97.7	10	0
APOA1	mRNA	10	0	0	0	0.0888889	0	33	10	0
CREB3L3	mRNA	10	0	0	0	0.0444444	0	30	10	0
miR4777	miRNA	10	1	0	1	0	1	3.8	0	10
miR519a-1	miRNA	10	4.72458	0.000148	0.211659	0.0476191	10	16	3	7
TMEM38A	mRNA	10	0	0	0	0.0666667	0	84.8	10	0
KBTBD12	mRNA	10	0	0	0	0.0222222	0	82.3	10	0
PLB1	mRNA	10	0	0	0	0.0777778	0	49.1	10	0
KERA	mRNA	10	0	0	0	0.0333333	0	13	10	0
MYPN	mRNA	10	0	0	0	0.0888889	0	101.9	10	0
miR320b-1	miRNA	10	1.71429	5e-07	0.583333	0.125	2	5.875	2	8
miR136	miRNA	10	8.96658	0.000199	0.111525	0.233333	17	19.3333	5	5
C3orf43	mRNA	10	0	0	0	0.0222222	0	96.4	10	0
NPTX2	mRNA	10	0	0	0	0.0222222	0	10.1	10	0
TNNI2	mRNA	10	0	0	0	0.133333	0	96.6	10	0
miR15a	miRNA	10	1	0	1	0	1	3.7	0	10
TBC1D26	mRNA	10	0	0	0	0.0444444	0	50	10	0
VTN	mRNA	10	0	0	0	0.0444444	0	34.3	10	0
HAMP	mRNA	10	0	0	0	0.0555556	0	33.3	10	0
MYADML2	mRNA	10	0	0	0	0.0666667	0	86.7	10	0
miR128-2	miRNA	10	1.61905	2.66e-05	0.617647	0.0416667	2	9.55556	2	8
PROL1	mRNA	10	0	0	0	0.1	0	15.3	10	0
TNNI1	mRNA	10	0	0	0	0.0888889	0	111.3	10	0
TRIM63	mRNA	10	0	0	0	0.0666667	0	80	10	0
miR138-2	miRNA	10	1.25	2.8e-07	0.8	0.0416667	2	4.22222	1	9
CALML6	mRNA	10	0	0	0	0.0666667	0	101.4	10	0
miR30c-2	miRNA	10	2.8	1.97e-06	0.357143	0.0892857	4	8.5	3	7
let-7e	miRNA	10	2.51111	1.39e-05	0.39823	0.0277778	4	7	2	8
miR16-2	miRNA	10	7.84889	3.85e-05	0.127407	0.0833333	12	7.11111	3	7
miR4661	miRNA	10	1	0	1	0	1	3	0	10
ASB2	mRNA	10	0	0	0	0.0666667	0	72.1	10	0
miR105-2	miRNA	10	1.47059	3.9e-07	0.68	0.0138889	2	4	1	9
KCNIP2	mRNA	9	0	0	0	0.0416667	0	117.667	9	0
miR431	miRNA	9	9.96411	2.23e-05	0.10036	0.333333	19	15.8333	4	5
miR15b	miRNA	9	1.47059	0	0.68	0.0277778	2	5.11111	0	9
PIK3CA	mRNA	9	0	0	0	0	0	13.4444	9	0
miR939	miRNA	9	1.66667	1.85e-05	0.6	0.0357143	2	5.25	1	8
miR877	miRNA	9	7.97333	0.000165	0.125418	0.0555556	14	8	3	6
miR6511b-2	miRNA	9	9.88099	6.58e-05	0.101204	0.0238095	15	4.28571	2	7
miR1468	miRNA	9	1	0	1	0	1	4.44444	0	9
miR6718	miRNA	9	1	0	1	0	1	2.22222	0	9
miR935	miRNA	9	1	0	1	0	1	2.66667	0	9
let-7i	miRNA	9	1	0	1	0	1	4.11111	0	9
miR2355	miRNA	9	1	0	1	0	1	4.11111	0	9
miR3117	miRNA	9	1	0	1	0	1	3.55556	0	9
LMOD2	mRNA	9	0	0	0	0.0416667	0	99.8889	9	0
miR4664	miRNA	9	1	8.9e-07	1	0	1	5.11111	1	8
C1orf170	mRNA	9	0	0	0	0	0	98.8889	9	0
miR550a-3	miRNA	9	1.36364	3.6e-07	0.733333	0.119048	2	4.71429	2	7
PDE4DIP	mRNA	9	0	0	0	0.111111	0	111.111	9	0
LRP4	mRNA	9	0	0	0	0.0277778	0	10	9	0
MT1DP	mRNA	9	0	0	0	0.0277778	0	25.3333	9	0
miR99b	miRNA	9	9.86301	6.54e-05	0.101389	0.0178571	15	7	1	8
TMEM182	mRNA	9	0	0	0	0	0	105.556	9	0
WNT16	mRNA	9	0	0	0	0	0	26	9	0
IL1RL1	mRNA	9	0	0	0	0.0416667	0	28.6667	9	0
ALPK2	mRNA	9	0	0	0	0.0277778	0	77.3333	9	0
DUSP26	mRNA	9	0	0	0	0.0277778	0	102.889	9	0
miR188	miRNA	9	3.2	0.000271	0.3125	0.0178571	5	6	2	7
FOXL2	mRNA	9	0	0	0	0.0277778	0	36.2222	9	0
SEMA6C	mRNA	9	0	0	0	0	0	99.2222	9	0
DYSFIP1	mRNA	9	0	0	0	0	0	106	9	0
FITM1	mRNA	9	0	0	0	0.166667	0	87.5556	9	0
MYH2	mRNA	9	0	0	0	0.0555556	0	99.3333	9	0
TRIM54	mRNA	9	0	0	0	0.0277778	0	81.6667	9	0
GDAP2	mRNA	9	0	0	0	0.0277778	0	18.5556	9	0
miR7-3	miRNA	9	1.42857	2.2e-07	0.7	0.0535714	2	3	1	8
MYLK3	mRNA	9	0	0	0	0.0277778	0	92	9	0
IHH	mRNA	9	0	0	0	0.111111	0	28.6667	9	0
miR548j	miRNA	9	1	0	1	0	1	2.77778	0	9
miR4501	miRNA	9	1	0	1	0	1	2.33333	0	9
APOBEC2	mRNA	9	0	0	0	0.0277778	0	70.4444	9	0
miR520a	miRNA	9	5.70399	2.19e-05	0.175316	0.0714286	11	4.42857	2	7
miR526b	miRNA	9	5.70399	1.27e-05	0.175316	0.0714286	11	5.14286	2	7
OBSCN	mRNA	9	0	0	0	0.0138889	0	111	9	0
NRAP	mRNA	9	0	0	0	0.0277778	0	91.6667	9	0
miR128-1	miRNA	9	2	2.5e-05	0.5	0.0178571	3	10	2	7
DES	mRNA	9	0	0	0	0.111111	0	131.111	9	0
miR6854	miRNA	9	1	0	1	0	1	2.11111	0	9
MYH1	mRNA	9	0	0	0	0.111111	0	104.222	9	0
TCF21	mRNA	9	0	0	0	0.222222	0	25	9	0
miR135a-1	miRNA	9	1.2	3.3e-07	0.833333	0.0178571	2	3.5	1	8
miR6820	miRNA	8	1	0	1	0	1	4.125	0	8
IGLON5	mRNA	8	0	0	0	0.0714286	0	21.25	8	0
ROS1	mRNA	8	0	0	0	0	0	31.125	8	0
GATA4	mRNA	8	0	0	0	0.178571	0	32.125	8	0
miR2114	miRNA	8	1	0	1	0	1	2.25	0	8
HCCS	mRNA	8	0	0	0	0	0	60.125	8	0
miR3200	miRNA	8	7.912	0.000127	0.12639	0.133333	14	8.33333	2	6
miR185	miRNA	8	1.58824	3.3e-07	0.62963	0	2	5.28571	1	7
SLN	mRNA	8	0	0	0	0.107143	0	108.625	8	0
miR4787	miRNA	8	1	0	1	0	1	2.5	0	8
miR32	miRNA	8	1	2.02e-05	1	0.0535714	1	6.5	3	5
RFPL4B	mRNA	8	0	0	0	0.0535714	0	7.875	8	0
IGFBP1	mRNA	8	0	0	0	0.0178571	0	30.375	8	0
miR2110	miRNA	8	1	0	1	0	1	3.625	0	8
miR497	miRNA	8	3.2125	0.00028	0.311284	0	5	7.28571	2	6
miR6720	miRNA	8	1	0	1	0	1	2.75	0	8
TMOD1	mRNA	8	0	0	0	0.0357143	0	109.25	8	0
LIPE	mRNA	8	0	0	0	0.107143	0	120.875	8	0
DUSP27	mRNA	8	0	0	0	0	0	112	8	0
ATP2A2	mRNA	8	0	0	0	0	0	95.875	8	0
NEXN	mRNA	8	0	0	0	0.0357143	0	114.25	8	0
CSDAP1	mRNA	8	0	0	0	0	0	109	8	0
miR184	miRNA	8	1	0	1	0	1	2.375	0	8
KRT12	mRNA	8	0	0	0	0	0	11.75	8	0
miR187	miRNA	8	1	0	1	0	1	4	0	8
MAP3K15	mRNA	8	0	0	0	0.142857	0	26	8	0
CLTCL1	mRNA	8	0	0	0	0.0714286	0	103.875	8	0
TM4SF4	mRNA	8	0	0	0	0.0714286	0	30.5	8	0
NOS1	mRNA	8	0	0	0	0.214286	0	104.625	8	0
MT1F	mRNA	8	0	0	0	0.0178571	0	32	8	0
miR1291	miRNA	8	10.1022	1.99e-05	0.0989881	0	15	6.57143	1	7
CCL25	mRNA	8	0	0	0	0	0	18.625	8	0
MYBPC2	mRNA	8	0	0	0	0.107143	0	83.375	8	0
ATP2A1	mRNA	8	0	0	0	0.0357143	0	99	8	0
ACTN2	mRNA	8	0	0	0	0.107143	0	95.5	8	0
ANXA13	mRNA	8	0	0	0	0.0178571	0	13.875	8	0
miR655	miRNA	8	11.8317	0.000177	0.0845188	0.0476191	21	8.14286	2	6
miR4668	miRNA	8	1	0	1	0	1	4.625	0	8
C7orf53	mRNA	8	0	0	0	0.0178571	0	105.875	8	0
BGLAP	mRNA	8	0	0	0	0.0178571	0	20.75	8	0
SLC39A5	mRNA	8	0	0	0	0.0357143	0	27.25	8	0
LIX1	mRNA	8	0	0	0	0	0	17.375	8	0
ZFP106	mRNA	8	0	0	0	0.107143	0	94.375	8	0
miR331	miRNA	8	1	2.44e-05	1	0	1	6.375	2	6
SVIL	mRNA	8	0	0	0	0.107143	0	114.625	8	0
KLHL31	mRNA	8	0	0	0	0.0535714	0	129.25	8	0
ACTC1	mRNA	8	0	0	0	0.214286	0	101.125	8	0
PHKG1	mRNA	8	0	0	0	0.0357143	0	12.75	8	0
SMYD1	mRNA	8	0	0	0	0.0357143	0	99.875	8	0
miR98	miRNA	8	1	0	1	0	1	2.875	0	8
INHA	mRNA	8	0	0	0	0.0357143	0	37.875	8	0
MT1M	mRNA	8	0	0	0	0.0178571	0	33.375	8	0
PDLIM3	mRNA	8	0	0	0	0	0	67.125	8	0
HP	mRNA	8	0	0	0	0.125	0	36.125	8	0
MYH4	mRNA	8	0	0	0	0.0357143	0	72.125	8	0
ABRA	mRNA	8	0	0	0	0	0	98.25	8	0
MEGF11	mRNA	8	0	0	0	0.107143	0	34.25	8	0
MYH8	mRNA	8	0	0	0	0.107143	0	105.125	8	0
BCAS2	mRNA	8	0	0	0	0.0714286	0	23.75	8	0
KLHL4	mRNA	8	0	0	0	0.0535714	0	42.375	8	0
miR550a-2	miRNA	8	1.45455	3.3e-07	0.6875	0.133333	2	4.33333	2	6
STAC3	mRNA	8	0	0	0	0.0357143	0	99.5	8	0
MYOM1	mRNA	8	0	0	0	0.0535714	0	133.5	8	0
C2orf50	mRNA	8	0	0	0	0.0357143	0	19	8	0
STAR	mRNA	8	0	0	0	0.125	0	25.375	8	0
SPTB	mRNA	8	0	0	0	0.107143	0	104.5	8	0
miR3941	miRNA	8	1	0	1	0	1	1.625	0	8
ORM1	mRNA	8	0	0	0	0.0357143	0	29.625	8	0
SLC25A34	mRNA	8	0	0	0	0.142857	0	131.125	8	0
NRAS	mRNA	8	0	0	0	0.0357143	0	29.75	8	0
CATSPER1	mRNA	8	0	0	0	0.0178571	0	28.5	8	0
RYR1	mRNA	8	0	0	0	0	0	90.625	8	0
TCAP	mRNA	8	0	0	0	0.0357143	0	84	8	0
ACTA1	mRNA	8	0	0	0	0	0	95.25	8	0
miR6502	miRNA	8	1	0	1	0	1	3.5	0	8
ANKRD23	mRNA	8	0	0	0	0.107143	0	98	8	0
ENAM	mRNA	8	0	0	0	0.107143	0	111.875	8	0
ASB14	mRNA	8	0	0	0	0.142857	0	96	8	0
ABLIM2	mRNA	8	0	0	0	0.0357143	0	95.375	8	0
MYOZ3	mRNA	8	0	0	0	0.0357143	0	92.375	8	0
miR1247	miRNA	8	1	0	1	0	1	2.125	0	8
miR618	miRNA	8	1	0	1	0	1	3.25	0	8
TTN	mRNA	8	0	0	0	0.107143	0	95.5	8	0
MT1A	mRNA	8	0	0	0	0.0535714	0	27.375	8	0
miR138-1	miRNA	8	1.41667	1.7e-07	0.705882	0.0714286	2	5	1	7
BAAT	mRNA	8	0	0	0	0.0535714	0	31.875	8	0
miR7156	miRNA	8	1	0	1	0	1	4	0	8
NPTX1	mRNA	8	0	0	0	0.0357143	0	11.75	8	0
TNNT3	mRNA	8	0	0	0	0.0357143	0	93.75	8	0
TPM2	mRNA	8	0	0	0	0.142857	0	103.25	8	0
TKTL1	mRNA	7	0	0	0	0.0476191	0	37	7	0
miR376a-2	miRNA	7	1	6.07e-06	1	0.0238095	1	6.14286	1	6
HEPN1	mRNA	7	0	0	0	0.0476191	0	123.429	7	0
miR548v	miRNA	7	1	0	1	0	1	2.42857	0	7
miR339	miRNA	7	9.216	1.58e-05	0.108507	0	16	3.33333	1	6
SIK2	mRNA	7	0	0	0	0.0952381	0	133.286	7	0
ABCA8	mRNA	7	0	0	0	0.214286	0	94.2857	7	0
miR511	miRNA	7	1	0	1	0	1	3	0	7
miR487a	miRNA	7	1	6.58e-06	1	0.0238095	1	9.14286	2	5
PKIA	mRNA	7	0	0	0	0	0	90.7143	7	0
KCNMB2	mRNA	7	0	0	0	0	0	18	7	0
C3orf72	mRNA	7	0	0	0	0.380952	0	49.7143	7	0
FAM19A1	mRNA	7	0	0	0	0.0476191	0	21.8571	7	0
miR1226	miRNA	7	1.5	1.69e-05	0.666667	0.0666667	2	8.16667	4	3
KLHL33	mRNA	7	0	0	0	0.142857	0	89.1429	7	0
TEX14	mRNA	7	0	0	0	0	0	22.4286	7	0
ACSM5	mRNA	7	0	0	0	0.0714286	0	104.143	7	0
GATSL2	mRNA	7	0	0	0	0	0	107.429	7	0
SNORA81	mRNA	7	0	0	0	0	0	19.1429	7	0
RDH5	mRNA	7	0	0	0	0.0952381	0	111.571	7	0
IDI2	mRNA	7	0	0	0	0.0476191	0	96.4286	7	0
miR3615	miRNA	7	1	2.8e-07	1	0.0238095	1	5.71429	1	6
POPDC3	mRNA	7	0	0	0	0.142857	0	117.714	7	0
RBP4	mRNA	7	0	0	0	0.0238095	0	117.857	7	0
NPAS4	mRNA	7	0	0	0	0.0476191	0	25.4286	7	0
FABP4	mRNA	7	0	0	0	0.119048	0	115.429	7	0
IBSP	mRNA	7	0	0	0	0.142857	0	34	7	0
SLC5A2	mRNA	7	0	0	0	0	0	7.57143	7	0
CALCR	mRNA	7	0	0	0	0.0476191	0	18.1429	7	0
ENO3	mRNA	7	0	0	0	0.0476191	0	93.2857	7	0
ATE1	mRNA	7	0	0	0	0	0	11.4286	7	0
CAND2	mRNA	7	0	0	0	0.0476191	0	92.8571	7	0
miR1271	miRNA	7	9.26507	0.00205903	0.107932	0	14	11.4286	1	6
MYBPHL	mRNA	7	0	0	0	0.0238095	0	30.1429	7	0
MET	mRNA	7	0	0	0	0	0	10	7	0
NMU	mRNA	7	0	0	0	0	0	23	7	0
miR186	miRNA	7	5.89244	0.000453	0.169709	0.119048	12	9.14286	3	4
PLAC4	mRNA	7	0	0	0	0	0	26.8571	7	0
C3orf49	mRNA	7	0	0	0	0.0476191	0	15.2857	7	0
miR329-1	miRNA	7	1	0	1	0	1	6.42857	0	7
CMYA5	mRNA	7	0	0	0	0.0952381	0	92.4286	7	0
CUTC	mRNA	7	0	0	0	0.0714286	0	128.143	7	0
CYP8B1	mRNA	7	0	0	0	0.190476	0	35.7143	7	0
COL25A1	mRNA	7	0	0	0	0.0238095	0	10.4286	7	0
C6orf222	mRNA	7	0	0	0	0.0952381	0	21.1429	7	0
ITIH1	mRNA	7	0	0	0	0	0	27.2857	7	0
MYL3	mRNA	7	0	0	0	0.142857	0	75	7	0
miR6815	miRNA	7	1	0	1	0	1	4.85714	0	7
PIPOX	mRNA	7	0	0	0	0	0	35.4286	7	0
ASGR1	mRNA	7	0	0	0	0.0238095	0	27.5714	7	0
MUSTN1	mRNA	7	0	0	0	0.0476191	0	118.714	7	0
miR18b	miRNA	7	1	3.28e-05	1	0	1	11.2857	1	6
DUSP13	mRNA	7	0	0	0	0.142857	0	69.4286	7	0
OTUD1	mRNA	7	0	0	0	0.0476191	0	116.143	7	0
FEM1A	mRNA	7	0	0	0	0.142857	0	83.1429	7	0
ITGB1BP2	mRNA	7	0	0	0	0	0	80.8571	7	0
miR326	miRNA	7	1	0	1	0	1	2.42857	0	7
C8G	mRNA	7	0	0	0	0	0	33.1429	7	0
UCP3	mRNA	7	0	0	0	0.0476191	0	87.8571	7	0
CFL2	mRNA	7	0	0	0	0.142857	0	111.429	7	0
KRT39	mRNA	7	0	0	0	0	0	11	7	0
miR489	miRNA	7	1.72727	1.7e-07	0.578947	0.0666667	2	9	1	6
SEMA7A	mRNA	7	0	0	0	0.0714286	0	28	7	0
PRSS35	mRNA	7	0	0	0	0	0	21.5714	7	0
miR130a	miRNA	7	1	0	1	0	1	3.57143	0	7
CAMK2A	mRNA	7	0	0	0	0.142857	0	100.143	7	0
C4orf49	mRNA	7	0	0	0	0.357143	0	27.5714	7	0
HSD3B2	mRNA	7	0	0	0	0.0476191	0	29	7	0
miR550a-1	miRNA	7	1.54545	1.4e-07	0.647059	0.25	2	5.2	2	5
CKMT2	mRNA	7	0	0	0	0	0	105.571	7	0
TMEM233	mRNA	7	0	0	0	0.142857	0	115.429	7	0
LEAP2	mRNA	7	0	0	0	0.0238095	0	32	7	0
miR1180	miRNA	7	1.41667	0	0.705882	0.0238095	2	4.85714	0	7
HRC	mRNA	7	0	0	0	0.0476191	0	93.8571	7	0
AMPD1	mRNA	7	0	0	0	0.0476191	0	113.429	7	0
MYLK2	mRNA	7	0	0	0	0	0	91	7	0
MYOM3	mRNA	7	0	0	0	0.0476191	0	90.8571	7	0
C3orf45	mRNA	7	0	0	0	0.142857	0	99.4286	7	0
MYO18B	mRNA	7	0	0	0	0	0	104.571	7	0
LRRC2	mRNA	7	0	0	0	0	0	89.1429	7	0
AIMP1	mRNA	7	0	0	0	0.0476191	0	60.4286	7	0
SERPINC1	mRNA	7	0	0	0	0.0238095	0	26.1429	7	0
FSD2	mRNA	7	0	0	0	0.0952381	0	103.143	7	0
ZDHHC19	mRNA	7	0	0	0	0.0952381	0	25.7143	7	0
miR7705	miRNA	7	1	0	1	0	1	2.85714	0	7
ARG1	mRNA	7	0	0	0	0.0714286	0	32.2857	7	0
ADSSL1	mRNA	7	0	0	0	0.0476191	0	87.8571	7	0
MYLPF	mRNA	7	0	0	0	0.0476191	0	96.5714	7	0
ARGFXP2	mRNA	7	0	0	0	0	0	37.1429	7	0
ITIH4	mRNA	7	0	0	0	0.0238095	0	29.2857	7	0
SCARB1	mRNA	7	0	0	0	0.0476191	0	24.8571	7	0
miR4677	miRNA	7	1	0	1	0	1	2.14286	0	7
TNNC2	mRNA	7	0	0	0	0	0	103	7	0
APOC4	mRNA	7	0	0	0	0.0476191	0	27.5714	7	0
CA3	mRNA	7	0	0	0	0.0476191	0	114.571	7	0
ACY3	mRNA	6	0	0	0	0	0	39.1667	6	0
STAP1	mRNA	6	0	0	0	0.266667	0	133	6	0
miR3613	miRNA	6	6.47911	0.00265255	0.154342	0.05	12	7.2	2	4
CACNA2D1	mRNA	6	0	0	0	0	0	104.667	6	0
MRAP	mRNA	6	0	0	0	0.133333	0	104.167	6	0
CD19	mRNA	6	0	0	0	0.0666667	0	74.3333	6	0
miR380	miRNA	6	1	2.94e-06	1	0	1	6	1	5
GAS2	mRNA	6	0	0	0	0.0333333	0	20	6	0
MMD	mRNA	6	0	0	0	0.1	0	154.333	6	0
miR1185-1	miRNA	6	1	0	1	0	1	7.33333	0	6
MYLK4	mRNA	6	0	0	0	0.2	0	103.5	6	0
HSPB7	mRNA	6	0	0	0	0	0	114	6	0
PLIN1	mRNA	6	0	0	0	0.0666667	0	93.8333	6	0
miR1304	miRNA	6	1	0	1	0	1	2.5	0	6
miR6501	miRNA	6	2.1358	4.4e-07	0.468208	0	3	15.2	1	5
DPY19L2P1	mRNA	6	0	0	0	0.0666667	0	33.8333	6	0
miR1287	miRNA	6	1	0	1	0	1	5.5	0	6
miR6511b-1	miRNA	6	10.875	8.3e-07	0.091954	0.1	16	6.6	2	4
HTR1B	mRNA	6	0	0	0	0	0	16.1667	6	0
miR6842	miRNA	6	1	0	1	0	1	3.5	0	6
FCRLA	mRNA	6	0	0	0	0.133333	0	94.1667	6	0
PRKCB	mRNA	6	0	0	0	0.666667	0	167.833	6	0
POPDC2	mRNA	6	0	0	0	0.0666667	0	102.167	6	0
C7orf41	mRNA	6	0	0	0	0	0	153.833	6	0
miR3150b	miRNA	6	1	0	1	0	1	4.33333	0	6
LMOD3	mRNA	6	0	0	0	0	0	73.3333	6	0
DPF3	mRNA	6	0	0	0	0.0666667	0	114.333	6	0
miR485	miRNA	6	1	3.68e-06	1	0	1	7	2	4
ENPEP	mRNA	6	0	0	0	0	0	17.6667	6	0
IL21R	mRNA	6	0	0	0	0.8	0	168.667	6	0
FUNDC2	mRNA	6	0	0	0	0	0	34	6	0
USP2	mRNA	6	0	0	0	0.0666667	0	114.333	6	0
COLEC10	mRNA	6	0	0	0	0.2	0	38.1667	6	0
KCNK10	mRNA	6	0	0	0	0.0666667	0	25.3333	6	0
miR323b	miRNA	6	11.4715	3.17e-05	0.0871723	0.15	20	18.6	3	3
DOCK11	mRNA	6	0	0	0	0.1	0	145.167	6	0
miR3127	miRNA	6	1	0	1	0	1	1.66667	0	6
SIM1	mRNA	6	0	0	0	0.133333	0	12.5	6	0
EBF3	mRNA	6	0	0	0	0.266667	0	143	6	0
CARNS1	mRNA	6	0	0	0	0	0	86.8333	6	0
S100A5	mRNA	6	0	0	0	0	0	20.6667	6	0
miR3922	miRNA	6	1	0	1	0	1	1.5	0	6
TNMD	mRNA	6	0	0	0	0	0	19.8333	6	0
TBX21	mRNA	6	0	0	0	0.8	0	168.667	6	0
miR2116	miRNA	6	1	0	1	0	1	6	0	6
SP7	mRNA	6	0	0	0	0.166667	0	28.5	6	0
CACNB1	mRNA	6	0	0	0	0	0	84.5	6	0
GLYAT	mRNA	6	0	0	0	0.1	0	120.167	6	0
KCNJ15	mRNA	6	0	0	0	0.0666667	0	31.8333	6	0
MAG	mRNA	6	0	0	0	0	0	11.1667	6	0
COX7A1	mRNA	6	0	0	0	0	0	108.833	6	0
CABC1	mRNA	6	0	0	0	0.133333	0	105.833	6	0
XIRP1	mRNA	6	0	0	0	0	0	68.1667	6	0
C22orf31	mRNA	6	0	0	0	0.0666667	0	74.8333	6	0
SLC12A3	mRNA	6	0	0	0	0	0	10.1667	6	0
miR580	miRNA	6	1	0	1	0	1	3.5	0	6
PTPRC	mRNA	6	0	0	0	0.666667	0	167.833	6	0
SLC43A3	mRNA	6	0	0	0	0.0666667	0	37.8333	6	0
KBTBD10	mRNA	6	0	0	0	0.0666667	0	100.833	6	0
PYGM	mRNA	6	0	0	0	0.0666667	0	85.8333	6	0
TMEM52	mRNA	6	0	0	0	0.0666667	0	99.3333	6	0
AQP7P3	mRNA	6	0	0	0	0.133333	0	170.5	6	0
MEPE	mRNA	6	0	0	0	0.0666667	0	20.3333	6	0
HEPACAM	mRNA	6	0	0	0	0.166667	0	83.6667	6	0
SASH3	mRNA	6	0	0	0	0.8	0	168.667	6	0
miR376a-1	miRNA	6	1	0	1	0	1	7.16667	0	6
GNG3	mRNA	6	0	0	0	0	0	8.83333	6	0
miR503	miRNA	6	3.12281	8.6e-07	0.320225	0	4	6.8	1	5
miR6777	miRNA	6	1	0	1	0	1	3.66667	0	6
miR1245a	miRNA	6	1	0	1	0	1	2.33333	0	6
miR3664	miRNA	6	1	0	1	0	1	3.5	0	6
SHISA3	mRNA	6	0	0	0	0	0	22.1667	6	0
AADAC	mRNA	6	0	0	0	0.0666667	0	34.6667	6	0
miR484	miRNA	6	8.22578	0.000143	0.121569	0.0833333	15	8.25	3	3
SH2D1A	mRNA	6	0	0	0	0.666667	0	167.167	6	0
miR4999	miRNA	6	1	0	1	0	1	4.16667	0	6
miR491	miRNA	6	1	0	1	0	1	3.33333	0	6
PCOLCE2	mRNA	6	0	0	0	0.1	0	129	6	0
CD300LG	mRNA	6	0	0	0	0.0666667	0	125.333	6	0
MLANA	mRNA	6	0	0	0	0	0	19.8333	6	0
FAT3	mRNA	6	0	0	0	0.0666667	0	12.6667	6	0
SMAD5OS	mRNA	6	0	0	0	0.0666667	0	32.5	6	0
PNPLA1	mRNA	6	0	0	0	0.366667	0	18	6	0
FGL1	mRNA	6	0	0	0	0.0333333	0	29.1667	6	0
RRAD	mRNA	6	0	0	0	0.0666667	0	97.1667	6	0
SP140	mRNA	6	0	0	0	0.666667	0	167.833	6	0
FAM180B	mRNA	6	0	0	0	0.233333	0	108.833	6	0
MYNN	mRNA	6	0	0	0	0	0	15.1667	6	0
miR374a	miRNA	6	1	0	1	0	1	2.83333	0	6
SLAMF6	mRNA	6	0	0	0	0.666667	0	168.167	6	0
WDR64	mRNA	6	0	0	0	0	0	38.3333	6	0
miR6874	miRNA	6	1	0	1	0	1	3.83333	0	6
miR651	miRNA	6	1	0	1	0	1	2.33333	0	6
AQP2	mRNA	6	0	0	0	0.0666667	0	38.6667	6	0
ASB12	mRNA	6	0	0	0	0	0	95.5	6	0
C6orf142	mRNA	6	0	0	0	0	0	94	6	0
ANGPTL3	mRNA	6	0	0	0	0.1	0	35.8333	6	0
SYPL2	mRNA	6	0	0	0	0.133333	0	114.167	6	0
LRRC39	mRNA	6	0	0	0	0	0	74.8333	6	0
CYP11A1	mRNA	6	0	0	0	0.0666667	0	25.5	6	0
HBA1	mRNA	6	0	0	0	0.0666667	0	20.5	6	0
PDE2A	mRNA	6	0	0	0	0.0666667	0	91.1667	6	0
MPZ	mRNA	6	0	0	0	0	0	8.16667	6	0
miR4660	miRNA	6	1	0	1	0	1	2.33333	0	6
SMTNL2	mRNA	6	0	0	0	0	0	93.8333	6	0
miR504	miRNA	6	1	0	1	0	1	2.83333	0	6
miR1249	miRNA	6	1	0	1	0	1	3.5	0	6
ZMYND17	mRNA	6	0	0	0	0.2	0	100.667	6	0
TNNT1	mRNA	6	0	0	0	0.2	0	114	6	0
C21orf129	mRNA	6	0	0	0	0	0	64.1667	6	0
miR4640	miRNA	6	1	0	1	0	1	3	0	6
MYBPH	mRNA	6	0	0	0	0.133333	0	114.333	6	0
HPCAL4	mRNA	6	0	0	0	0.166667	0	32.5	6	0
CDH4	mRNA	6	0	0	0	0	0	41.5	6	0
FHL3	mRNA	6	0	0	0	0	0	99.6667	6	0
SAMD14	mRNA	6	0	0	0	0.0666667	0	13.5	6	0
FLNC	mRNA	6	0	0	0	0.2	0	103.667	6	0
KIAA0748	mRNA	6	0	0	0	0.266667	0	134	6	0
LOC339524	mRNA	6	0	0	0	0.233333	0	140.667	6	0
ASGR2	mRNA	6	0	0	0	0	0	20.3333	6	0
TMEM27	mRNA	6	0	0	0	0	0	30.3333	6	0
CYP19A1	mRNA	6	0	0	0	0.133333	0	30.1667	6	0
SMTNL1	mRNA	6	0	0	0	0	0	84.8333	6	0
SYNPO2	mRNA	6	0	0	0	0.2	0	103.333	6	0
SGCA	mRNA	6	0	0	0	0.2	0	104.167	6	0
FLG	mRNA	6	0	0	0	0	0	33.8333	6	0
miR4786	miRNA	6	1	0	1	0	1	4.33333	0	6
TBX22	mRNA	6	0	0	0	0.0666667	0	20	6	0
TBC1D3C	mRNA	6	0	0	0	0	0	15	6	0
TRIM33	mRNA	6	0	0	0	0	0	20.3333	6	0
MAMSTR	mRNA	6	0	0	0	0.0666667	0	91.8333	6	0
GRAMD1B	mRNA	6	0	0	0	0.333333	0	24	6	0
TRDN	mRNA	6	0	0	0	0	0	113	6	0
TTBK1	mRNA	6	0	0	0	0.0333333	0	25.3333	6	0
TNNC1	mRNA	6	0	0	0	0	0	84.5	6	0
ANKRD2	mRNA	6	0	0	0	0	0	99.5	6	0
TRPM3	mRNA	6	0	0	0	0	0	24.8333	6	0
FBXO40	mRNA	6	0	0	0	0	0	116.833	6	0
MYOZ1	mRNA	6	0	0	0	0.0666667	0	98.6667	6	0
UNC45B	mRNA	6	0	0	0	0	0	106.167	6	0
GRIP2	mRNA	6	0	0	0	0	0	119.167	6	0
TRIM7	mRNA	6	0	0	0	0	0	97	6	0
MYBPC1	mRNA	6	0	0	0	0.133333	0	104.667	6	0
ELAVL4	mRNA	6	0	0	0	0.0666667	0	28.5	6	0
GFI1B	mRNA	6	0	0	0	0.0666667	0	36.1667	6	0
CTSE	mRNA	6	0	0	0	0	0	12.3333	6	0
miR1270	miRNA	6	1	0	1	0	1	4.16667	0	6
PTGDS	mRNA	6	0	0	0	0	0	19.1667	6	0
LGALS7	mRNA	6	0	0	0	0	0	30.1667	6	0
LRMP	mRNA	6	0	0	0	0.0666667	0	23.3333	6	0
miR4473	miRNA	6	1	0	1	0	1	3.16667	0	6
MRO	mRNA	6	0	0	0	0.0666667	0	27.5	6	0
AURKC	mRNA	6	0	0	0	0	0	10.5	6	0
miR891a	miRNA	5	1	0	1	0	1	3.6	0	5
HSPB6	mRNA	5	0	0	0	0.1	0	122.6	5	0
WNT1	mRNA	5	0	0	0	0	0	7.2	5	0
SCN4A	mRNA	5	0	0	0	0.1	0	109.6	5	0
LRRN4CL	mRNA	5	0	0	0	0.05	0	145.8	5	0
CPN2	mRNA	5	0	0	0	0.15	0	22.6	5	0
TMEM37	mRNA	5	0	0	0	0	0	134	5	0
miR1229	miRNA	5	1.33333	9.03e-06	0.75	0	2	4.25	1	4
MGLL	mRNA	5	0	0	0	0.1	0	162	5	0
GALR2	mRNA	5	0	0	0	0	0	26	5	0
miR616	miRNA	5	1.66667	0	0.6	0	2	6.4	0	5
TAS1R1	mRNA	5	0	0	0	0.05	0	13.4	5	0
GSTA2	mRNA	5	0	0	0	0	0	18.2	5	0
PLIN4	mRNA	5	0	0	0	0	0	101.6	5	0
C11orf93	mRNA	5	0	0	0	0	0	44.2	5	0
MESTIT1	mRNA	5	0	0	0	0.1	0	99	5	0
miR3928	miRNA	5	1	0	1	0	1	7.2	0	5
VKORC1L1	mRNA	5	0	0	0	0.1	0	147.4	5	0
LYVE1	mRNA	5	0	0	0	0.25	0	161	5	0
BRD7P3	mRNA	5	0	0	0	0	0	28.2	5	0
miR148b	miRNA	5	7.76	3.4e-05	0.128866	0.166667	12	8.5	2	3
miR3690-1	miRNA	5	1	0	1	0	1	3.6	0	5
TRHDE	mRNA	5	0	0	0	0.1	0	135.8	5	0
PCDHAC2	mRNA	5	0	0	0	0	0	10.2	5	0
BVES	mRNA	5	0	0	0	0.1	0	118.2	5	0
miR5694	miRNA	5	1	0	1	0	1	2.6	0	5
PLEK	mRNA	5	0	0	0	0.75	0	187.6	5	0
ZNF675	mRNA	5	0	0	0	0	0	15.4	5	0
miR377	miRNA	5	1	2.87e-06	1	0	1	9	2	3
HS3ST2	mRNA	5	0	0	0	0	0	19	5	0
LCP2	mRNA	5	0	0	0	0.75	0	187.6	5	0
TNS1	mRNA	5	0	0	0	0.1	0	81.8	5	0
FOXP3	mRNA	5	0	0	0	1	0	194	5	0
GRAP2	mRNA	5	0	0	0	1	0	194	5	0
CCL5	mRNA	5	0	0	0	1	0	194	5	0
MTCP1	mRNA	5	0	0	0	0	0	19.4	5	0
C20orf200	mRNA	5	0	0	0	0	0	104.8	5	0
miR320d-2	miRNA	5	1	2.2e-07	1	0.333333	1	5.5	3	2
TSLP	mRNA	5	0	0	0	0.2	0	117.6	5	0
GPR155	mRNA	5	0	0	0	0	0	13	5	0
PPP1R1A	mRNA	5	0	0	0	0.15	0	147.8	5	0
CHRM4	mRNA	5	0	0	0	0.1	0	20.6	5	0
SORBS1	mRNA	5	0	0	0	0.2	0	179.8	5	0
ST7OT3	mRNA	5	0	0	0	0	0	13.8	5	0
C6	mRNA	5	0	0	0	0.2	0	109	5	0
SLC16A7	mRNA	5	0	0	0	0.05	0	121	5	0
SLC19A3	mRNA	5	0	0	0	0.05	0	144	5	0
CXCL9	mRNA	5	0	0	0	0.75	0	187.6	5	0
L1TD1	mRNA	5	0	0	0	0	0	13.4	5	0
CDO1	mRNA	5	0	0	0	0.1	0	100	5	0
miR548o-2	miRNA	5	1	0	1	0	1	2.4	0	5
KLK12	mRNA	5	0	0	0	0	0	13.4	5	0
FGG	mRNA	5	0	0	0	0	0	27.8	5	0
HVCN1	mRNA	5	0	0	0	0.2	0	108.6	5	0
miR543	miRNA	5	1	0	1	0	1	8	0	5
TRIML2	mRNA	5	0	0	0	0	0	35	5	0
miR361	miRNA	5	1	9.31e-06	1	0	1	18	2	3
ZCCHC12	mRNA	5	0	0	0	0	0	14.8	5	0
CD53	mRNA	5	0	0	0	1	0	194	5	0
CCR5	mRNA	5	0	0	0	1	0	194	5	0
miR576	miRNA	5	1	1.43e-06	1	0.2	1	8.4	3	2
ACHE	mRNA	5	0	0	0	0	0	110.8	5	0
PKLR	mRNA	5	0	0	0	0.1	0	15.2	5	0
DMBT1	mRNA	5	0	0	0	0.1	0	32.2	5	0
GPR146	mRNA	5	0	0	0	0.15	0	160.6	5	0
miR151b	miRNA	5	1	0	1	0	1	4.2	0	5
PLXNA4	mRNA	5	0	0	0	0.1	0	161	5	0
PYHIN1	mRNA	5	0	0	0	0.6	0	185.8	5	0
ASPA	mRNA	5	0	0	0	0.15	0	179.8	5	0
THBS4	mRNA	5	0	0	0	0	0	10.2	5	0
FAM150B	mRNA	5	0	0	0	0	0	11.6	5	0
GPR171	mRNA	5	0	0	0	1	0	194	5	0
ADAMTS5	mRNA	5	0	0	0	0.05	0	130.2	5	0
CLDN18	mRNA	5	0	0	0	0	0	21.4	5	0
C5orf20	mRNA	5	0	0	0	1	0	194	5	0
CCT6A	mRNA	5	0	0	0	0	0	11.4	5	0
ACOT6	mRNA	5	0	0	0	0	0	10.6	5	0
KCNA5	mRNA	5	0	0	0	0.05	0	14.4	5	0
CD52	mRNA	5	0	0	0	0	0	8	5	0
DOCK2	mRNA	5	0	0	0	1	0	194	5	0
PNMA5	mRNA	5	0	0	0	0.4	0	12.6	5	0
miR545	miRNA	5	1	0	1	0	1	5.4	0	5
CBLN1	mRNA	5	0	0	0	0	0	25.4	5	0
PPAPDC3	mRNA	5	0	0	0	0.3	0	100.2	5	0
SYNGR4	mRNA	5	0	0	0	0	0	27.8	5	0
TMPRSS9	mRNA	5	0	0	0	0	0	43.4	5	0
BTNL9	mRNA	5	0	0	0	0.05	0	133.4	5	0
TNFRSF9	mRNA	5	0	0	0	0.6	0	162	5	0
miR494	miRNA	5	13.698	4.45e-06	0.0730033	0.0833333	23	7.75	2	3
COQ10A	mRNA	5	0	0	0	0	0	91.8	5	0
miR455	miRNA	5	4.87212	0	0.205249	0	9	14.6	0	5
LGALS12	mRNA	5	0	0	0	0.1	0	180.4	5	0
TMEM11	mRNA	5	0	0	0	0	0	14.2	5	0
KLK14	mRNA	5	0	0	0	0	0	49.8	5	0
HSD17B13	mRNA	5	0	0	0	0.1	0	141.4	5	0
C9orf84	mRNA	5	0	0	0	0	0	11.2	5	0
GOT1	mRNA	5	0	0	0	0.1	0	105.2	5	0
LPL	mRNA	5	0	0	0	0.05	0	149.4	5	0
VTCN1	mRNA	5	0	0	0	0	0	15.8	5	0
KCTD14	mRNA	5	0	0	0	0	0	17.6	5	0
MYH13	mRNA	5	0	0	0	0.1	0	75.8	5	0
EPAS1	mRNA	5	0	0	0	0.05	0	102.2	5	0
CCL16	mRNA	5	0	0	0	0	0	34.8	5	0
C7orf65	mRNA	5	0	0	0	0	0	8.8	5	0
SLC26A7	mRNA	5	0	0	0	0	0	11.2	5	0
miR3199-1	miRNA	5	1	0	1	0	1	2.8	0	5
ITGB1BP1	mRNA	5	0	0	0	0.15	0	152.2	5	0
TEKT3	mRNA	5	0	0	0	0	0	43.2	5	0
miR548e	miRNA	5	1	0	1	0	1	3	0	5
CTLA4	mRNA	5	0	0	0	1	0	194	5	0
CCDC69	mRNA	5	0	0	0	0.1	0	168.6	5	0
GALNT9	mRNA	5	0	0	0	0	0	12.6	5	0
BYSL	mRNA	5	0	0	0	0	0	17.2	5	0
miR4521	miRNA	5	1	0	1	0	1	2.4	0	5
ITGA7	mRNA	5	0	0	0	0.05	0	132.2	5	0
DDIT4L	mRNA	5	0	0	0	0.3	0	103.6	5	0
CLIC5	mRNA	5	0	0	0	0.1	0	118.2	5	0
CASQ2	mRNA	5	0	0	0	0.1	0	118.4	5	0
ARHGAP36	mRNA	5	0	0	0	0	0	15.4	5	0
KRT10	mRNA	5	0	0	0	0	0	47.6	5	0
RNLS	mRNA	5	0	0	0	0.3	0	27.2	5	0
PNMT	mRNA	5	0	0	0	0	0	7.6	5	0
TCL1A	mRNA	5	0	0	0	0.1	0	102.2	5	0
ZPLD1	mRNA	5	0	0	0	0.1	0	112	5	0
miR632	miRNA	5	1	0	1	0	1	2.6	0	5
DACH2	mRNA	5	0	0	0	0	0	27.2	5	0
LRRC20	mRNA	5	0	0	0	0.1	0	117.4	5	0
PHTF1	mRNA	5	0	0	0	0.1	0	21.4	5	0
ZNF697	mRNA	5	0	0	0	0	0	19.4	5	0
EPHA5	mRNA	5	0	0	0	0	0	16.2	5	0
miR412	miRNA	5	1	0	1	0	1	2.8	0	5
IL1A	mRNA	5	0	0	0	0	0	50.2	5	0
KLHL30	mRNA	5	0	0	0	0	0	119.8	5	0
TBC1D3B	mRNA	5	0	0	0	0.1	0	20.6	5	0
GPR18	mRNA	5	0	0	0	0.4	0	170.8	5	0
LOC389333	mRNA	5	0	0	0	0	0	102.2	5	0
miR190a	miRNA	5	1	0	1	0	1	3.2	0	5
DNAJB5	mRNA	5	0	0	0	0.1	0	97.2	5	0
OMG	mRNA	5	0	0	0	0	0	10.2	5	0
PGAM2	mRNA	5	0	0	0	0	0	86.4	5	0
SLC13A5	mRNA	5	0	0	0	0	0	30.4	5	0
CLEC3B	mRNA	5	0	0	0	0.35	0	137	5	0
CTNND1	mRNA	5	0	0	0	0	0	16.8	5	0
FGFBP3	mRNA	5	0	0	0	0	0	33	5	0
CHRNA6	mRNA	5	0	0	0	0.1	0	30.2	5	0
MYOM2	mRNA	5	0	0	0	0.05	0	141	5	0
NKX3-1	mRNA	5	0	0	0	0.1	0	17.4	5	0
ICOS	mRNA	5	0	0	0	1	0	194	5	0
SLC8A3	mRNA	5	0	0	0	0.1	0	103	5	0
CIDEA	mRNA	5	0	0	0	0.15	0	198.6	5	0
FCN3	mRNA	5	0	0	0	0.15	0	36.8	5	0
LOC143188	mRNA	5	0	0	0	0	0	10.8	5	0
FAM153B	mRNA	5	0	0	0	0.2	0	26.8	5	0
AOC3	mRNA	5	0	0	0	0.1	0	179.8	5	0
ANTXR2	mRNA	5	0	0	0	0.25	0	155.8	5	0
SLC47A1	mRNA	5	0	0	0	0.35	0	24.6	5	0
FCGR3B	mRNA	5	0	0	0	0.1	0	21.8	5	0
FYB	mRNA	5	0	0	0	1	0	194	5	0
ANKRD7	mRNA	5	0	0	0	0	0	8	5	0
SIGLEC11	mRNA	5	0	0	0	0.1	0	23.8	5	0
SLC25A4	mRNA	5	0	0	0	0	0	77.2	5	0
S100A2	mRNA	5	0	0	0	0	0	48.8	5	0
miR1343	miRNA	5	1	0	1	0	1	5	0	5
CTCFL	mRNA	5	0	0	0	0	0	17.2	5	0
FILIP1	mRNA	5	0	0	0	0.1	0	105	5	0
SIRPG	mRNA	5	0	0	0	0.75	0	187.6	5	0
ODF3L2	mRNA	5	0	0	0	0	0	27.2	5	0
CD34	mRNA	5	0	0	0	0.2	0	164.4	5	0
PTPN7	mRNA	5	0	0	0	1	0	194	5	0
CD36	mRNA	5	0	0	0	0	0	131.8	5	0
FHL1	mRNA	5	0	0	0	0.1	0	119.6	5	0
miR3610	miRNA	5	1	0	1	0	1	3.2	0	5
XCL2	mRNA	5	0	0	0	0.75	0	187.6	5	0
AMY2A	mRNA	5	0	0	0	0	0	14.4	5	0
TIFAB	mRNA	5	0	0	0	1	0	194	5	0
SNX20	mRNA	5	0	0	0	1	0	194	5	0
FDX1	mRNA	5	0	0	0	0.2	0	29.2	5	0
SCGB1D2	mRNA	5	0	0	0	0.2	0	17.2	5	0
IL18BP	mRNA	5	0	0	0	1	0	194	5	0
BSND	mRNA	5	0	0	0	0	0	21	5	0
CD58	mRNA	5	0	0	0	0	0	16.4	5	0
PZP	mRNA	5	0	0	0	0	0	21.4	5	0
SRL	mRNA	5	0	0	0	0.1	0	118	5	0
NPR1	mRNA	5	0	0	0	0.1	0	148.6	5	0
PRR11	mRNA	5	0	0	0	0	0	7.8	5	0
GSN	mRNA	5	0	0	0	0.15	0	140	5	0
DCLRE1B	mRNA	5	0	0	0	0	0	23	5	0
BRCC3	mRNA	5	0	0	0	0	0	17.4	5	0
FCRL1	mRNA	5	0	0	0	0.1	0	93.8	5	0
miR3678	miRNA	5	1	0	1	0	1	1.4	0	5
SBSN	mRNA	5	0	0	0	0	0	21.2	5	0
OLIG1	mRNA	5	0	0	0	0	0	26.8	5	0
CLDN16	mRNA	5	0	0	0	0	0	40.8	5	0
ADIPOQ	mRNA	5	0	0	0	0.05	0	188.8	5	0
TMEM143	mRNA	5	0	0	0	0	0	88.6	5	0
miR216a	miRNA	5	1.63636	3.3e-07	0.611111	0.0833333	2	5.5	1	4
PROKR1	mRNA	5	0	0	0	0.1	0	18.6	5	0
ABCC2	mRNA	5	0	0	0	0	0	10.4	5	0
MT1H	mRNA	5	0	0	0	0.15	0	51.4	5	0
BIN1	mRNA	5	0	0	0	0.1	0	84.4	5	0
RIPPLY1	mRNA	5	0	0	0	0	0	17.8	5	0
TAC4	mRNA	5	0	0	0	0	0	7	5	0
CASQ1	mRNA	5	0	0	0	0	0	102.4	5	0
ST18	mRNA	5	0	0	0	0.3	0	26.2	5	0
MATN1	mRNA	5	0	0	0	0	0	18.2	5	0
miR3129	miRNA	5	1	0	1	0	1	6.2	0	5
SSTR1	mRNA	5	0	0	0	0	0	65.2	5	0
RPSAP52	mRNA	5	0	0	0	0	0	34.4	5	0
miR4781	miRNA	5	1	0	1	0	1	2.6	0	5
DBH	mRNA	5	0	0	0	0.35	0	39.2	5	0
CUZD1	mRNA	5	0	0	0	0	0	14.6	5	0
MS4A1	mRNA	5	0	0	0	0.1	0	83	5	0
KRT79	mRNA	5	0	0	0	0.1	0	16.2	5	0
CRP	mRNA	5	0	0	0	0	0	32.8	5	0
ACTN3	mRNA	5	0	0	0	0.1	0	81.6	5	0
miR548aw	miRNA	5	1	0	1	0	1	3.2	0	5
TIGIT	mRNA	5	0	0	0	0.75	0	167.4	5	0
MASP2	mRNA	5	0	0	0	0.05	0	38.6	5	0
SLITRK3	mRNA	5	0	0	0	0.1	0	48.6	5	0
PDC	mRNA	5	0	0	0	0.3	0	32	5	0
GPD1	mRNA	5	0	0	0	0.1	0	126.2	5	0
MYH7B	mRNA	5	0	0	0	0.1	0	102.4	5	0
APOC2	mRNA	5	0	0	0	0.05	0	37	5	0
PLEK2	mRNA	5	0	0	0	0	0	42.8	5	0
ITK	mRNA	5	0	0	0	0.6	0	166.4	5	0
MBOAT4	mRNA	5	0	0	0	0.15	0	27.2	5	0
MAB21L2	mRNA	5	0	0	0	0	0	15.6	5	0
CYP17A1	mRNA	5	0	0	0	0	0	26.8	5	0
miR1277	miRNA	5	1	0	1	0	1	3.4	0	5
GCKR	mRNA	5	0	0	0	0.1	0	39	5	0
GPR88	mRNA	5	0	0	0	0	0	39.8	5	0
APOB	mRNA	5	0	0	0	0	0	34.8	5	0
GDA	mRNA	5	0	0	0	0	0	108.4	5	0
RSPH9	mRNA	5	0	0	0	0	0	38.8	5	0
LDB3	mRNA	5	0	0	0	0.1	0	88	5	0
miR3130-1	miRNA	5	1.33333	1.7e-07	0.75	0	2	3.75	1	4
miR585	miRNA	5	1	0	1	0	1	2.8	0	5
ASPRV1	mRNA	5	0	0	0	0	0	30.4	5	0
miR135a-2	miRNA	5	1.6	1.1e-07	0.625	0.0833333	2	6.25	1	4
RNF133	mRNA	4	0	0	0	0	0	33	4	0
P2RX6	mRNA	4	0	0	0	0	0	124.75	4	0
ST7OT4	mRNA	4	0	0	0	0	0	13	4	0
SLC29A4	mRNA	4	0	0	0	0	0	157.75	4	0
KRT2	mRNA	4	0	0	0	0	0	19	4	0
let-7g	miRNA	4	1	1.13e-05	1	0	1	7.5	1	3
AICDA	mRNA	4	0	0	0	0	0	96.25	4	0
ABCD2	mRNA	4	0	0	0	0	0	125	4	0
ZNF7	mRNA	4	0	0	0	0	0	23.75	4	0
HSD17B3	mRNA	4	0	0	0	0	0	60	4	0
CCDC129	mRNA	4	0	0	0	0.166667	0	22.25	4	0
BPIL1	mRNA	4	0	0	0	0	0	19.25	4	0
LAX1	mRNA	4	0	0	0	0.5	0	205.75	4	0
CKB	mRNA	4	0	0	0	0.166667	0	26.25	4	0
miR574	miRNA	4	1	1e-06	1	0	1	8.75	1	3
ITSN1	mRNA	4	0	0	0	0	0	93.25	4	0
STX11	mRNA	4	0	0	0	0.0833333	0	198.5	4	0
ANK2	mRNA	4	0	0	0	0.166667	0	181	4	0
FOXN3	mRNA	4	0	0	0	0.0833333	0	158.25	4	0
UOX	mRNA	4	0	0	0	0.166667	0	26.25	4	0
miR7706	miRNA	4	1	5.62e-06	1	0	1	5.25	1	3
CDK5R2	mRNA	4	0	0	0	0	0	27.75	4	0
C1orf203	mRNA	4	0	0	0	0	0	15.25	4	0
AQP7	mRNA	4	0	0	0	0.166667	0	162.25	4	0
miR760	miRNA	4	1	0	1	0	1	4	0	4
TP63	mRNA	4	0	0	0	0	0	50.25	4	0
PDK4	mRNA	4	0	0	0	0.166667	0	162.5	4	0
GPX3	mRNA	4	0	0	0	0.166667	0	147	4	0
C1orf213	mRNA	4	0	0	0	0	0	17.25	4	0
HSPA6	mRNA	4	0	0	0	0	0	35.25	4	0
NLRC3	mRNA	4	0	0	0	1	0	214.5	4	0
KCNIP1	mRNA	4	0	0	0	0	0	18	4	0
RHOQ	mRNA	4	0	0	0	0	0	103.75	4	0
CNR2	mRNA	4	0	0	0	0.166667	0	118.5	4	0
JPH2	mRNA	4	0	0	0	0.166667	0	119.75	4	0
miR433	miRNA	4	1	1.48e-06	1	0	1	8.25	1	3
EIF2C2	mRNA	4	0	0	0	0	0	10.75	4	0
ACP5	mRNA	4	0	0	0	0.166667	0	68.75	4	0
CLCN5	mRNA	4	0	0	0	0.5	0	15.25	4	0
PAMR1	mRNA	4	0	0	0	0.0833333	0	132.25	4	0
ANO5	mRNA	4	0	0	0	0	0	70.5	4	0
ALAS2	mRNA	4	0	0	0	0	0	30	4	0
MYOC	mRNA	4	0	0	0	0	0	32.5	4	0
PARP15	mRNA	4	0	0	0	0.166667	0	171.25	4	0
C3orf55	mRNA	4	0	0	0	0.333333	0	122.25	4	0
CNRIP1	mRNA	4	0	0	0	0.333333	0	144.5	4	0
MGC16025	mRNA	4	0	0	0	0	0	22.5	4	0
C4BPA	mRNA	4	0	0	0	0.166667	0	16.75	4	0
NXPH2	mRNA	4	0	0	0	0	0	11.75	4	0
SIT1	mRNA	4	0	0	0	0.5	0	205.25	4	0
ANGPTL5	mRNA	4	0	0	0	0.0833333	0	99.5	4	0
EMR3	mRNA	4	0	0	0	0	0	5.5	4	0
ELOVL4	mRNA	4	0	0	0	0.166667	0	26.75	4	0
HCLS1	mRNA	4	0	0	0	0.583333	0	199	4	0
ACADL	mRNA	4	0	0	0	0.0833333	0	154	4	0
miR3074	miRNA	4	1	0	1	0	1	6	0	4
miR3909	miRNA	4	1	0	1	0	1	8	0	4
SLC7A14	mRNA	4	0	0	0	0.166667	0	43	4	0
ZEB2	mRNA	4	0	0	0	0.166667	0	181	4	0
SRD5A2	mRNA	4	0	0	0	0	0	13.75	4	0
ST6GALNAC6	mRNA	4	0	0	0	0	0	168.75	4	0
C12orf42	mRNA	4	0	0	0	0	0	21.5	4	0
SCGN	mRNA	4	0	0	0	0	0	19	4	0
miR320c-2	miRNA	4	1	3.3e-07	1	0.166667	1	6	2	2
UGP2	mRNA	4	0	0	0	0.0833333	0	174.5	4	0
DMGDH	mRNA	4	0	0	0	0.0833333	0	175.5	4	0
SLAMF7	mRNA	4	0	0	0	0.75	0	154	4	0
GCOM1	mRNA	4	0	0	0	0	0	158.25	4	0
SLC24A4	mRNA	4	0	0	0	0	0	15.75	4	0
SDPR	mRNA	4	0	0	0	0.0833333	0	150	4	0
SRPX	mRNA	4	0	0	0	0.166667	0	153.75	4	0
SCTR	mRNA	4	0	0	0	0	0	32.25	4	0
MAP1LC3C	mRNA	4	0	0	0	0	0	168.75	4	0
HLA-DRA	mRNA	4	0	0	0	0.75	0	144.5	4	0
CDC14B	mRNA	4	0	0	0	0	0	83.75	4	0
C4orf7	mRNA	4	0	0	0	0	0	22.75	4	0
GBX2	mRNA	4	0	0	0	0.166667	0	24.5	4	0
OPCML	mRNA	4	0	0	0	0	0	28	4	0
WFIKKN2	mRNA	4	0	0	0	0	0	39.25	4	0
ALDH2	mRNA	4	0	0	0	0.166667	0	175	4	0
PLSCR4	mRNA	4	0	0	0	0.25	0	205	4	0
TIMD4	mRNA	4	0	0	0	0	0	91.75	4	0
RETSAT	mRNA	4	0	0	0	0.0833333	0	135.25	4	0
C2CD2	mRNA	4	0	0	0	0.166667	0	166.25	4	0
KLRD1	mRNA	4	0	0	0	0.666667	0	206.5	4	0
FCRL3	mRNA	4	0	0	0	0.333333	0	126	4	0
SLC15A1	mRNA	4	0	0	0	0	0	39.75	4	0
CAPN5	mRNA	4	0	0	0	0	0	28.5	4	0
miR320d-1	miRNA	4	1.5	0	0.666667	0.666667	2	7.33333	3	1
KCNH7	mRNA	4	0	0	0	0	0	9.75	4	0
DST	mRNA	4	0	0	0	0.583333	0	30.75	4	0
KCNA6	mRNA	4	0	0	0	0	0	57.25	4	0
CYP3A4	mRNA	4	0	0	0	0.166667	0	25.5	4	0
CD4	mRNA	4	0	0	0	1	0	214.5	4	0
PROK2	mRNA	4	0	0	0	0	0	20.25	4	0
NCALD	mRNA	4	0	0	0	0.166667	0	30.25	4	0
ZBTB32	mRNA	4	0	0	0	0	0	32	4	0
KRT40	mRNA	4	0	0	0	0	0	23.25	4	0
UNC5C	mRNA	4	0	0	0	0	0	6	4	0
ALPK3	mRNA	4	0	0	0	0	0	106	4	0
SEMA4D	mRNA	4	0	0	0	1	0	162	4	0
SPOCK2	mRNA	4	0	0	0	1	0	214.5	4	0
ADH6	mRNA	4	0	0	0	0.166667	0	50.75	4	0
miR6761	miRNA	4	1	0	1	0	1	5.5	0	4
miR579	miRNA	4	1	0	1	0	1	4	0	4
miR4746	miRNA	4	1	0	1	0	1	3.5	0	4
GPR111	mRNA	4	0	0	0	0	0	11.75	4	0
HLA-DMB	mRNA	4	0	0	0	1	0	224	4	0
CCR2	mRNA	4	0	0	0	1	0	224	4	0
SEMA3G	mRNA	4	0	0	0	0.166667	0	96.25	4	0
miR1262	miRNA	4	1	0	1	0	1	1.5	0	4
DMKN	mRNA	4	0	0	0	0	0	25.75	4	0
TMED6	mRNA	4	0	0	0	0	0	11.5	4	0
AOAH	mRNA	4	0	0	0	0.25	0	137.75	4	0
miR624	miRNA	4	1	0	1	0	1	3.5	0	4
GFI1	mRNA	4	0	0	0	1	0	214.5	4	0
ACO1	mRNA	4	0	0	0	0.25	0	151.5	4	0
FADS6	mRNA	4	0	0	0	0	0	14.75	4	0
AKAP12	mRNA	4	0	0	0	0.416667	0	174.5	4	0
NUPL2	mRNA	4	0	0	0	0.166667	0	16	4	0
TSHZ2	mRNA	4	0	0	0	0	0	109.75	4	0
ANGPTL1	mRNA	4	0	0	0	0.0833333	0	144.5	4	0
miR330	miRNA	4	1.76923	1.1e-07	0.565217	0	2	6.66667	1	3
LOC100188949	mRNA	4	0	0	0	0.5	0	204.25	4	0
LOC285419	mRNA	4	0	0	0	0	0	94	4	0
C1orf111	mRNA	4	0	0	0	0.333333	0	12.25	4	0
CHST4	mRNA	4	0	0	0	0.166667	0	22	4	0
GPBAR1	mRNA	4	0	0	0	0	0	111.75	4	0
LBXCOR1	mRNA	4	0	0	0	0	0	20	4	0
C17orf87	mRNA	4	0	0	0	1	0	214.5	4	0
EVI2B	mRNA	4	0	0	0	1	0	224	4	0
ZNRF3	mRNA	4	0	0	0	0	0	36.25	4	0
TUBA8	mRNA	4	0	0	0	0	0	98	4	0
C12orf71	mRNA	4	0	0	0	0	0	17.75	4	0
C14orf139	mRNA	4	0	0	0	0.0833333	0	192.75	4	0
TNFSF11	mRNA	4	0	0	0	0	0	21	4	0
NCF1	mRNA	4	0	0	0	1	0	214.5	4	0
GNLY	mRNA	4	0	0	0	0.166667	0	141.5	4	0
AQP4	mRNA	4	0	0	0	0	0	74.5	4	0
TIMP4	mRNA	4	0	0	0	0	0	102.25	4	0
ITGAL	mRNA	4	0	0	0	0.666667	0	137.5	4	0
GRIK1	mRNA	4	0	0	0	0.166667	0	16	4	0
BLK	mRNA	4	0	0	0	0.166667	0	107.75	4	0
GSG1L	mRNA	4	0	0	0	0	0	10	4	0
C1QL2	mRNA	4	0	0	0	0	0	10.25	4	0
miR5683	miRNA	4	1	3.3e-07	1	0	1	94.25	2	2
miR3190	miRNA	4	1	0	1	0	1	4.75	0	4
SH2D1B	mRNA	4	0	0	0	0	0	13.75	4	0
IGFL3	mRNA	4	0	0	0	0.166667	0	44	4	0
RNASE13	mRNA	4	0	0	0	0	0	12.5	4	0
miR320c-1	miRNA	4	1	0	1	0	1	5.25	0	4
NPEPL1	mRNA	4	0	0	0	0	0	70.75	4	0
DDR2	mRNA	4	0	0	0	0.166667	0	175	4	0
CD8A	mRNA	4	0	0	0	0.666667	0	190.75	4	0
BTLA	mRNA	4	0	0	0	0.5	0	205.25	4	0
FRMD1	mRNA	4	0	0	0	0.416667	0	174.5	4	0
DNAJC5B	mRNA	4	0	0	0	0.166667	0	26	4	0
EOMES	mRNA	4	0	0	0	0.666667	0	206.5	4	0
ACSL1	mRNA	4	0	0	0	0	0	156.5	4	0
IRF8	mRNA	4	0	0	0	1	0	198.75	4	0
miR2277	miRNA	4	1	3.55e-06	1	0	1	6.5	1	3
miR372	miRNA	4	1	0	1	0	1	2.25	0	4
NAT8L	mRNA	4	0	0	0	0	0	162.25	4	0
SPTBN1	mRNA	4	0	0	0	0.0833333	0	148	4	0
NKG7	mRNA	4	0	0	0	1	0	224	4	0
GPR85	mRNA	4	0	0	0	0	0	8.75	4	0
PSORS1C2	mRNA	4	0	0	0	0	0	8	4	0
PPARG	mRNA	4	0	0	0	0.166667	0	96.25	4	0
SPOCK3	mRNA	4	0	0	0	0	0	37.5	4	0
CD226	mRNA	4	0	0	0	1	0	214.5	4	0
SPN	mRNA	4	0	0	0	1	0	214.5	4	0
miR1284	miRNA	4	1	0	1	0	1	3	0	4
ARHGAP15	mRNA	4	0	0	0	1	0	224	4	0
miR296	miRNA	4	1	0	1	0	1	4	0	4
CD40LG	mRNA	4	0	0	0	0.5	0	189.5	4	0
KLB	mRNA	4	0	0	0	0.0833333	0	164.5	4	0
GZMA	mRNA	4	0	0	0	0.75	0	144.5	4	0
PROC	mRNA	4	0	0	0	0.166667	0	40.5	4	0
C1orf92	mRNA	4	0	0	0	0	0	52.25	4	0
PRF1	mRNA	4	0	0	0	0.666667	0	206.5	4	0
SLIT3	mRNA	4	0	0	0	0.166667	0	181	4	0
ZBBX	mRNA	4	0	0	0	0	0	60.25	4	0
PPAP2B	mRNA	4	0	0	0	0.0833333	0	192.75	4	0
FATE1	mRNA	4	0	0	0	0.0833333	0	23.5	4	0
EPM2A	mRNA	4	0	0	0	0	0	94	4	0
CTNNA3	mRNA	4	0	0	0	0	0	62.5	4	0
TGM4	mRNA	4	0	0	0	0	0	13	4	0
FAM40B	mRNA	4	0	0	0	0	0	100.25	4	0
PRSS1	mRNA	4	0	0	0	0	0	8.5	4	0
CYP4F2	mRNA	4	0	0	0	0	0	12.25	4	0
TMEM132C	mRNA	4	0	0	0	0	0	164	4	0
CRTAM	mRNA	4	0	0	0	0.666667	0	206.5	4	0
miR5706	miRNA	4	1	0	1	0	1	5.5	0	4
FASLG	mRNA	4	0	0	0	0.75	0	154	4	0
CA4	mRNA	4	0	0	0	0.166667	0	127.25	4	0
TNR	mRNA	4	0	0	0	0	0	12.75	4	0
GRIN3B	mRNA	4	0	0	0	0.5	0	15.75	4	0
IL2RG	mRNA	4	0	0	0	1	0	224	4	0
EBF1	mRNA	4	0	0	0	0.0833333	0	109.75	4	0
CDHR2	mRNA	4	0	0	0	0.166667	0	20.25	4	0
DNAH12	mRNA	4	0	0	0	0	0	47.5	4	0
VWA5B1	mRNA	4	0	0	0	0	0	23	4	0
ASB4	mRNA	4	0	0	0	0	0	122.25	4	0
C15orf54	mRNA	4	0	0	0	0	0	19.5	4	0
CCDC42B	mRNA	4	0	0	0	0	0	58	4	0
CAP2	mRNA	4	0	0	0	0	0	125.25	4	0
PALMD	mRNA	4	0	0	0	0.25	0	107.75	4	0
CES4	mRNA	4	0	0	0	0	0	57.25	4	0
WAS	mRNA	4	0	0	0	1	0	170.75	4	0
PRTN3	mRNA	4	0	0	0	0	0	14.25	4	0
CD48	mRNA	4	0	0	0	1	0	224	4	0
LMAN1L	mRNA	4	0	0	0	0	0	29.5	4	0
CD3E	mRNA	4	0	0	0	1	0	214.5	4	0
ABCA6	mRNA	4	0	0	0	0.0833333	0	192.75	4	0
LOC154822	mRNA	4	0	0	0	0	0	50.5	4	0
SFRP5	mRNA	4	0	0	0	0	0	20.25	4	0
OR2AE1	mRNA	4	0	0	0	0	0	13.25	4	0
VMO1	mRNA	4	0	0	0	0	0	77	4	0
IGF2	mRNA	4	0	0	0	0.166667	0	17.25	4	0
KLHL6	mRNA	4	0	0	0	1	0	224	4	0
SDS	mRNA	4	0	0	0	0.0833333	0	33.25	4	0
CCND2	mRNA	4	0	0	0	0	0	5.5	4	0
SLAMF1	mRNA	4	0	0	0	1	0	214.5	4	0
ABCA10	mRNA	4	0	0	0	0.0833333	0	141	4	0
VCX3A	mRNA	4	0	0	0	0	0	16.5	4	0
KRT83	mRNA	4	0	0	0	0.166667	0	30	4	0
IKZF1	mRNA	4	0	0	0	1	0	224	4	0
LOC645323	mRNA	4	0	0	0	0.5	0	18.25	4	0
KRT1	mRNA	4	0	0	0	0	0	30	4	0
KCNRG	mRNA	4	0	0	0	0	0	60.25	4	0
SOST	mRNA	4	0	0	0	0.5	0	26.5	4	0
DPEP3	mRNA	4	0	0	0	0	0	19.5	4	0
ATP1A2	mRNA	4	0	0	0	0.166667	0	123	4	0
VPREB3	mRNA	4	0	0	0	0.166667	0	91	4	0
WNT7A	mRNA	4	0	0	0	0	0	45.5	4	0
CNGA3	mRNA	4	0	0	0	0	0	101	4	0
STAT4	mRNA	4	0	0	0	1	0	224	4	0
CXCR6	mRNA	4	0	0	0	1	0	224	4	0
SLAMF8	mRNA	4	0	0	0	0.75	0	128.75	4	0
NIPSNAP3B	mRNA	4	0	0	0	0.0833333	0	168	4	0
CLRN3	mRNA	4	0	0	0	0	0	37.25	4	0
ACAP1	mRNA	4	0	0	0	1	0	214.5	4	0
CD3G	mRNA	4	0	0	0	1	0	224	4	0
POU2F3	mRNA	4	0	0	0	0	0	48.5	4	0
UBASH3A	mRNA	4	0	0	0	1	0	214.5	4	0
HAO2	mRNA	4	0	0	0	0	0	51.25	4	0
TXLNB	mRNA	4	0	0	0	0	0	86.5	4	0
CXCR3	mRNA	4	0	0	0	1	0	224	4	0
CAPZA2	mRNA	4	0	0	0	0.0833333	0	15.25	4	0
IL10RA	mRNA	4	0	0	0	0.666667	0	190.75	4	0
C17orf51	mRNA	4	0	0	0	0.5	0	20.25	4	0
CR2	mRNA	4	0	0	0	0.166667	0	102.5	4	0
CCDC17	mRNA	4	0	0	0	0	0	51	4	0
BIN2	mRNA	4	0	0	0	1	0	214.5	4	0
FAM83C	mRNA	4	0	0	0	0	0	57.25	4	0
LEPRE1	mRNA	4	0	0	0	0.166667	0	38.5	4	0
MYBPC3	mRNA	4	0	0	0	0	0	11.75	4	0
miR643	miRNA	4	1	0	1	0	1	3.5	0	4
ARHGAP20	mRNA	4	0	0	0	0.0833333	0	156.5	4	0
NRSN1	mRNA	4	0	0	0	0	0	23	4	0
MATN4	mRNA	4	0	0	0	0.0833333	0	10.75	4	0
FCRL2	mRNA	4	0	0	0	0	0	90.5	4	0
GHR	mRNA	4	0	0	0	0.166667	0	150	4	0
NEFL	mRNA	4	0	0	0	0	0	25.75	4	0
BCL2L14	mRNA	4	0	0	0	0.0833333	0	14	4	0
FOLR3	mRNA	4	0	0	0	0	0	18.25	4	0
TEKT4	mRNA	4	0	0	0	0	0	59.25	4	0
INS-IGF2	mRNA	4	0	0	0	0	0	13.5	4	0
CD2	mRNA	4	0	0	0	1	0	214.5	4	0
TLR10	mRNA	4	0	0	0	0.166667	0	127.5	4	0
CPO	mRNA	4	0	0	0	0.166667	0	41	4	0
CD96	mRNA	4	0	0	0	1	0	224	4	0
ROPN1L	mRNA	4	0	0	0	0	0	52.25	4	0
LTA	mRNA	4	0	0	0	1	0	224	4	0
DHRS11	mRNA	4	0	0	0	0.166667	0	21.5	4	0
GABRQ	mRNA	4	0	0	0	0	0	24.5	4	0
SLA2	mRNA	4	0	0	0	1	0	214.5	4	0
ALDOB	mRNA	4	0	0	0	0.0833333	0	33.25	4	0
DUOXA2	mRNA	4	0	0	0	0.0833333	0	34.25	4	0
CLCN1	mRNA	4	0	0	0	0	0	121.75	4	0
SVEP1	mRNA	4	0	0	0	0.0833333	0	140.5	4	0
WARS2	mRNA	4	0	0	0	0.166667	0	26.5	4	0
HSD11B1	mRNA	4	0	0	0	0.0833333	0	39	4	0
TUSC5	mRNA	4	0	0	0	0	0	138.25	4	0
C6orf127	mRNA	4	0	0	0	0	0	35.75	4	0
FOXN4	mRNA	4	0	0	0	0	0	44.5	4	0
LY9	mRNA	4	0	0	0	0.5	0	190	4	0
ANKRD1	mRNA	4	0	0	0	0	0	104.75	4	0
C6orf15	mRNA	4	0	0	0	0	0	26.25	4	0
miR639	miRNA	4	1	0	1	0	1	4.5	0	4
C7	mRNA	4	0	0	0	0	0	23.25	4	0
miR625	miRNA	4	1	0	1	0	1	2.25	0	4
miR1254-2	miRNA	4	1.25	1.1e-07	0.8	0	2	3.66667	1	3
MDGA2	mRNA	4	0	0	0	0	0	11.5	4	0
miR766	miRNA	4	1	0	1	0	1	3	0	4
ARPP21	mRNA	4	0	0	0	0	0	61.75	4	0
NTNG1	mRNA	4	0	0	0	0.0833333	0	34.75	4	0
MMP9	mRNA	4	0	0	0	0.166667	0	29.75	4	0
PLN	mRNA	4	0	0	0	0	0	123	4	0
LOC100128573	mRNA	4	0	0	0	0.166667	0	16.75	4	0
SCN3A	mRNA	4	0	0	0	0.166667	0	42	4	0
REG4	mRNA	4	0	0	0	0	0	7.75	4	0
CYP39A1	mRNA	4	0	0	0	0	0	14	4	0
USP13	mRNA	4	0	0	0	0	0	101	4	0
CCNI2	mRNA	4	0	0	0	0.166667	0	14.75	4	0
MB	mRNA	4	0	0	0	0.166667	0	86.5	4	0
CD5	mRNA	4	0	0	0	1	0	224	4	0
KLHL34	mRNA	4	0	0	0	0	0	112.25	4	0
C3orf35	mRNA	4	0	0	0	0.166667	0	15.5	4	0
PHOSPHO1	mRNA	4	0	0	0	0	0	18	4	0
CCDC135	mRNA	4	0	0	0	0	0	43	4	0
IL17D	mRNA	4	0	0	0	0.166667	0	121.5	4	0
WDR3	mRNA	4	0	0	0	0	0	17.5	4	0
IL20RB	mRNA	4	0	0	0	0	0	24.25	4	0
SLC22A10	mRNA	4	0	0	0	0	0	13.75	4	0
IDO2	mRNA	4	0	0	0	0	0	12	4	0
BAGE2	mRNA	4	0	0	0	0	0	11.25	4	0
BTN1A1	mRNA	4	0	0	0	0	0	14	4	0
CDH19	mRNA	4	0	0	0	0	0	20.25	4	0
PRR4	mRNA	4	0	0	0	0.166667	0	32	4	0
AACSL	mRNA	4	0	0	0	0	0	14.25	4	0
CRISPLD1	mRNA	4	0	0	0	0	0	23	4	0
miR940	miRNA	4	2.12195	1.22e-06	0.471264	0	3	12	1	3
CD177	mRNA	4	0	0	0	0	0	14.75	4	0
GPR12	mRNA	4	0	0	0	0.166667	0	22.75	4	0
miR3130-2	miRNA	4	1.5	1.1e-07	0.666667	0	2	3	1	3
PDIA2	mRNA	4	0	0	0	0	0	40.75	4	0
miR5000	miRNA	4	1	0	1	0	1	2.5	0	4
NHEDC2	mRNA	4	0	0	0	0.0833333	0	16.25	4	0
GYS2	mRNA	3	0	0	0	0	0	146.667	3	0
GRIA4	mRNA	3	0	0	0	0	0	38.6667	3	0
FAM149A	mRNA	3	0	0	0	0.333333	0	190	3	0
GALNTL2	mRNA	3	0	0	0	0	0	115.333	3	0
CCDC3	mRNA	3	0	0	0	0	0	78.3333	3	0
AIFM2	mRNA	3	0	0	0	0	0	175.333	3	0
miR4638	miRNA	3	1	4.29e-06	1	0	1	10.3333	1	2
TXNIP	mRNA	3	0	0	0	0	0	128	3	0
FUT7	mRNA	3	0	0	0	1	0	261.333	3	0
DHDDS	mRNA	3	0	0	0	0.333333	0	111	3	0
PROS1	mRNA	3	0	0	0	0.333333	0	121	3	0
C5orf62	mRNA	3	0	0	0	0	0	130.667	3	0
IGSF6	mRNA	3	0	0	0	0.5	0	217	3	0
ALDH1A2	mRNA	3	0	0	0	0	0	183	3	0
LAMA4	mRNA	3	0	0	0	0.166667	0	118.333	3	0
miR6892	miRNA	3	1	0	1	0	1	4.33333	0	3
MAMDC2	mRNA	3	0	0	0	0	0	93	3	0
ADH1B	mRNA	3	0	0	0	0	0	177.333	3	0
ENPP2	mRNA	3	0	0	0	0.333333	0	25.6667	3	0
PCP2	mRNA	3	0	0	0	0.333333	0	52	3	0
AG2	mRNA	3	0	0	0	0	0	26.6667	3	0
NTF4	mRNA	3	0	0	0	0	0	53	3	0
ANKRD20A4	mRNA	3	0	0	0	0	0	24.3333	3	0
IL16	mRNA	3	0	0	0	0.333333	0	178.667	3	0
miR7854	miRNA	3	1	0	1	0	1	5.33333	0	3
CETP	mRNA	3	0	0	0	0	0	17	3	0
BTN3A2	mRNA	3	0	0	0	1	0	261.333	3	0
C1QL1	mRNA	3	0	0	0	0	0	32	3	0
DMRT2	mRNA	3	0	0	0	0.166667	0	59.6667	3	0
SLC6A7	mRNA	3	0	0	0	0	0	22	3	0
NTS	mRNA	3	0	0	0	0	0	19	3	0
DNM3	mRNA	3	0	0	0	0	0	6.66667	3	0
CAV2	mRNA	3	0	0	0	0.166667	0	198	3	0
ZNF34	mRNA	3	0	0	0	0.333333	0	33.3333	3	0
MDFIC	mRNA	3	0	0	0	0.333333	0	215	3	0
LOC100188947	mRNA	3	0	0	0	0	0	38.6667	3	0
ZNF16	mRNA	3	0	0	0	0.333333	0	33.3333	3	0
CTNNA2	mRNA	3	0	0	0	0	0	44.3333	3	0
TMEM220	mRNA	3	0	0	0	0	0	91	3	0
RGMA	mRNA	3	0	0	0	0.5	0	59.6667	3	0
C7orf58	mRNA	3	0	0	0	0.166667	0	175	3	0
CACHD1	mRNA	3	0	0	0	0	0	143	3	0
VAT1L	mRNA	3	0	0	0	0.333333	0	14.3333	3	0
FAM92B	mRNA	3	0	0	0	0	0	73.3333	3	0
GLYCTK	mRNA	3	0	0	0	0	0	91.6667	3	0
AQP7P1	mRNA	3	0	0	0	0.333333	0	215	3	0
TLN2	mRNA	3	0	0	0	0	0	151	3	0
C8orf33	mRNA	3	0	0	0	0	0	29	3	0
KLRC1	mRNA	3	0	0	0	0	0	66.3333	3	0
NCR1	mRNA	3	0	0	0	0.666667	0	168	3	0
CD22	mRNA	3	0	0	0	0	0	31	3	0
MID1	mRNA	3	0	0	0	0.166667	0	60.3333	3	0
miR329-2	miRNA	3	1	0	1	0	1	3	0	3
RNASE2	mRNA	3	0	0	0	0	0	28.6667	3	0
GABRA5	mRNA	3	0	0	0	0.333333	0	15.3333	3	0
CLIC2	mRNA	3	0	0	0	0	0	176	3	0
FBXL18	mRNA	3	0	0	0	0	0	14.6667	3	0
CEP68	mRNA	3	0	0	0	0.166667	0	190	3	0
PTPN22	mRNA	3	0	0	0	0.333333	0	171.667	3	0
PTX4	mRNA	3	0	0	0	0	0	8.66667	3	0
GNAI1	mRNA	3	0	0	0	0	0	142.333	3	0
GABBR2	mRNA	3	0	0	0	0	0	22.6667	3	0
ANGPT4	mRNA	3	0	0	0	0	0	126	3	0
POU3F2	mRNA	3	0	0	0	0.333333	0	16	3	0
DHRS9	mRNA	3	0	0	0	0	0	9	3	0
DNAH9	mRNA	3	0	0	0	0	0	61.3333	3	0
EBF2	mRNA	3	0	0	0	0.333333	0	92.3333	3	0
miR548b	miRNA	3	1	0	1	0	1	3	0	3
TAGLN3	mRNA	3	0	0	0	0	0	79.3333	3	0
MAB21L1	mRNA	3	0	0	0	0.166667	0	182.333	3	0
DSG1	mRNA	3	0	0	0	0	0	10.6667	3	0
FAM163A	mRNA	3	0	0	0	0.333333	0	12	3	0
C20orf114	mRNA	3	0	0	0	0	0	21	3	0
miR548o	miRNA	3	1	0	1	0	1	6.33333	0	3
BHLHE22	mRNA	3	0	0	0	0	0	20.3333	3	0
miR671	miRNA	3	9.84089	4.34e-06	0.101617	0	16	7.5	1	2
HLA-DQA1	mRNA	3	0	0	0	0.5	0	217	3	0
SYNE1	mRNA	3	0	0	0	0.166667	0	139	3	0
CD7	mRNA	3	0	0	0	1	0	261.333	3	0
NCAN	mRNA	3	0	0	0	0	0	4.33333	3	0
ZNF643	mRNA	3	0	0	0	0	0	20.3333	3	0
DPYSL5	mRNA	3	0	0	0	0	0	51	3	0
VCAM1	mRNA	3	0	0	0	0	0	62.6667	3	0
miR3170	miRNA	3	1	0	1	0	1	2.33333	0	3
TENC1	mRNA	3	0	0	0	0	0	198	3	0
EFHA2	mRNA	3	0	0	0	0	0	78	3	0
HCN3	mRNA	3	0	0	0	0	0	25.3333	3	0
KLC4	mRNA	3	0	0	0	0	0	14	3	0
FAM13C	mRNA	3	0	0	0	0	0	198	3	0
GPM6A	mRNA	3	0	0	0	0.333333	0	19	3	0
FERMT2	mRNA	3	0	0	0	0.333333	0	190	3	0
miR421	miRNA	3	1	0	1	0	1	6	0	3
KCNJ12	mRNA	3	0	0	0	0	0	37	3	0
FKBP6	mRNA	3	0	0	0	0	0	11.3333	3	0
CD209	mRNA	3	0	0	0	0.166667	0	198	3	0
INHBE	mRNA	3	0	0	0	0	0	30.6667	3	0
KLF15	mRNA	3	0	0	0	0.166667	0	166.333	3	0
CTSS	mRNA	3	0	0	0	1	0	120.333	3	0
TRPM5	mRNA	3	0	0	0	0	0	25.3333	3	0
GDPD4	mRNA	3	0	0	0	0.333333	0	30.6667	3	0
KLHL29	mRNA	3	0	0	0	0	0	130.667	3	0
ABCG4	mRNA	3	0	0	0	0.166667	0	17	3	0
SLC47A2	mRNA	3	0	0	0	0	0	56.3333	3	0
FKBP9L	mRNA	3	0	0	0	0	0	27.6667	3	0
CENPA	mRNA	3	0	0	0	0.5	0	48.3333	3	0
SLC22A1	mRNA	3	0	0	0	0	0	30	3	0
KIR2DL4	mRNA	3	0	0	0	1	0	191.333	3	0
KIAA0087	mRNA	3	0	0	0	0	0	17	3	0
FOLH1	mRNA	3	0	0	0	0.333333	0	14.6667	3	0
LOC729668	mRNA	3	0	0	0	0	0	23	3	0
ROPN1B	mRNA	3	0	0	0	1	0	54.6667	3	0
ORM2	mRNA	3	0	0	0	0	0	28	3	0
CD86	mRNA	3	0	0	0	1	0	191.333	3	0
GATA3	mRNA	3	0	0	0	0.5	0	109.667	3	0
CYTIP	mRNA	3	0	0	0	1	0	240.333	3	0
LOC286367	mRNA	3	0	0	0	0.166667	0	190	3	0
XCL1	mRNA	3	0	0	0	1	0	227.667	3	0
CSDC2	mRNA	3	0	0	0	0	0	29	3	0
GRM5	mRNA	3	0	0	0	0	0	6.33333	3	0
PAH	mRNA	3	0	0	0	0	0	29.6667	3	0
RHOJ	mRNA	3	0	0	0	0	0	145.667	3	0
NXF3	mRNA	3	0	0	0	0	0	8.66667	3	0
miR1228	miRNA	3	1	0	1	0	1	4.66667	0	3
CHRAC1	mRNA	3	0	0	0	0.333333	0	26	3	0
PTH1R	mRNA	3	0	0	0	0	0	62.3333	3	0
CHRDL1	mRNA	3	0	0	0	0	0	163	3	0
miR570	miRNA	3	1	0	1	0	1	3.66667	0	3
NCKAP1L	mRNA	3	0	0	0	1	0	261.333	3	0
GBP5	mRNA	3	0	0	0	0.666667	0	168	3	0
RBM17	mRNA	3	0	0	0	0.666667	0	67	3	0
GPR109A	mRNA	3	0	0	0	0.166667	0	119.333	3	0
miR6808	miRNA	3	1	0	1	0	1	4.33333	0	3
TGFBR2	mRNA	3	0	0	0	0	0	198.667	3	0
TPTE2	mRNA	3	0	0	0	0	0	12.6667	3	0
C17orf55	mRNA	3	0	0	0	0	0	15.6667	3	0
LPXN	mRNA	3	0	0	0	1	0	191.333	3	0
FAIM3	mRNA	3	0	0	0	0.333333	0	155.667	3	0
NGRN	mRNA	3	0	0	0	0	0	23.6667	3	0
SHISA4	mRNA	3	0	0	0	0	0	88.6667	3	0
NLRP11	mRNA	3	0	0	0	0	0	73.6667	3	0
CXCR5	mRNA	3	0	0	0	0	0	131.333	3	0
SOAT1	mRNA	3	0	0	0	0.333333	0	18	3	0
IRF4	mRNA	3	0	0	0	0.333333	0	205	3	0
APOBEC3D	mRNA	3	0	0	0	1	0	261.333	3	0
SCARA5	mRNA	3	0	0	0	0.166667	0	207	3	0
LILRB1	mRNA	3	0	0	0	1	0	261.333	3	0
CD38	mRNA	3	0	0	0	0.666667	0	147	3	0
PROK1	mRNA	3	0	0	0	0	0	15	3	0
LDB2	mRNA	3	0	0	0	0	0	198	3	0
SNORD17	mRNA	3	0	0	0	0	0	15	3	0
PRRT4	mRNA	3	0	0	0	0	0	178.333	3	0
ALDH1L1	mRNA	3	0	0	0	0	0	147.667	3	0
CCND3	mRNA	3	0	0	0	0	0	17.3333	3	0
SAA1	mRNA	3	0	0	0	0	0	40.3333	3	0
HBB	mRNA	3	0	0	0	0.333333	0	36.6667	3	0
TMEM22	mRNA	3	0	0	0	0.333333	0	215	3	0
UGT3A2	mRNA	3	0	0	0	0	0	19.6667	3	0
SCARNA16	mRNA	3	0	0	0	0	0	8.66667	3	0
SLC1A3	mRNA	3	0	0	0	0.166667	0	118.333	3	0
GBAS	mRNA	3	0	0	0	0	0	8.66667	3	0
FREM1	mRNA	3	0	0	0	0.166667	0	169.333	3	0
LTB	mRNA	3	0	0	0	0	0	14	3	0
SOX15	mRNA	3	0	0	0	0	0	75	3	0
RSPH10B2	mRNA	3	0	0	0	0	0	13.6667	3	0
CHST1	mRNA	3	0	0	0	0	0	37	3	0
C1QTNF4	mRNA	3	0	0	0	0	0	21.3333	3	0
KIAA1383	mRNA	3	0	0	0	0	0	15	3	0
TPK1	mRNA	3	0	0	0	0	0	42.3333	3	0
ABCB1	mRNA	3	0	0	0	0	0	125.333	3	0
GIMAP5	mRNA	3	0	0	0	0.5	0	128.667	3	0
SLC7A10	mRNA	3	0	0	0	0	0	189.333	3	0
ECM2	mRNA	3	0	0	0	0.333333	0	215	3	0
PRH2	mRNA	3	0	0	0	0	0	117.667	3	0
FAM180A	mRNA	3	0	0	0	0	0	63	3	0
SIPA1L2	mRNA	3	0	0	0	0	0	22.6667	3	0
KCNK12	mRNA	3	0	0	0	0	0	11.3333	3	0
DENND1C	mRNA	3	0	0	0	0.333333	0	214	3	0
UNC13C	mRNA	3	0	0	0	0	0	46.6667	3	0
MED19	mRNA	3	0	0	0	0	0	18.3333	3	0
RHOF	mRNA	3	0	0	0	1	0	261.333	3	0
ITGB7	mRNA	3	0	0	0	1	0	261.333	3	0
KIAA1804	mRNA	3	0	0	0	1	0	54.6667	3	0
TMX2	mRNA	3	0	0	0	0	0	20.3333	3	0
NR3C1	mRNA	3	0	0	0	0.333333	0	98.3333	3	0
LAMC3	mRNA	3	0	0	0	0	0	80.3333	3	0
ZNF713	mRNA	3	0	0	0	0	0	15.3333	3	0
ELTD1	mRNA	3	0	0	0	0.333333	0	215	3	0
SCN1B	mRNA	3	0	0	0	0.333333	0	106.333	3	0
KRT86	mRNA	3	0	0	0	0	0	18	3	0
CXorf21	mRNA	3	0	0	0	1	0	240.333	3	0
HLF	mRNA	3	0	0	0	0	0	98.6667	3	0
TNFRSF1B	mRNA	3	0	0	0	0.666667	0	169.667	3	0
PLGLB2	mRNA	3	0	0	0	0	0	35	3	0
MYL6B	mRNA	3	0	0	0	0	0	99.3333	3	0
PPP1R3C	mRNA	3	0	0	0	0	0	104	3	0
C8orf75	mRNA	3	0	0	0	0.166667	0	17.6667	3	0
GPR87	mRNA	3	0	0	0	0	0	71	3	0
TCF7L1	mRNA	3	0	0	0	0.5	0	68.6667	3	0
UCN2	mRNA	3	0	0	0	0	0	25.6667	3	0
APOBEC3H	mRNA	3	0	0	0	1	0	261.333	3	0
C1orf187	mRNA	3	0	0	0	0	0	10.3333	3	0
CCL26	mRNA	3	0	0	0	0	0	13.3333	3	0
KLK1	mRNA	3	0	0	0	0	0	32.6667	3	0
miR4766	miRNA	3	1	0	1	0	1	3	0	3
GP5	mRNA	3	0	0	0	0.333333	0	105.333	3	0
miR5003	miRNA	3	1	0	1	0	1	5.33333	0	3
HHIP	mRNA	3	0	0	0	0	0	14	3	0
ASAM	mRNA	3	0	0	0	0.333333	0	96.6667	3	0
PRG4	mRNA	3	0	0	0	0	0	10.3333	3	0
ZFP57	mRNA	3	0	0	0	0	0	20.6667	3	0
CORO2B	mRNA	3	0	0	0	0.333333	0	215	3	0
LOC100130776	mRNA	3	0	0	0	0	0	20.3333	3	0
ABCC9	mRNA	3	0	0	0	0	0	133	3	0
CSDA	mRNA	3	0	0	0	0	0	89.3333	3	0
miR1254-1	miRNA	3	1.5	6e-08	0.666667	0	2	2.5	1	2
CD72	mRNA	3	0	0	0	0.333333	0	130.667	3	0
TYRO3	mRNA	3	0	0	0	0.166667	0	207	3	0
HGF	mRNA	3	0	0	0	0.333333	0	32	3	0
BIRC3	mRNA	3	0	0	0	1	0	261.333	3	0
PDCD1	mRNA	3	0	0	0	1	0	227.667	3	0
NTRK1	mRNA	3	0	0	0	0	0	45.3333	3	0
LOC285629	mRNA	3	0	0	0	0	0	16	3	0
CLEC17A	mRNA	3	0	0	0	0.333333	0	36.3333	3	0
PID1	mRNA	3	0	0	0	0.166667	0	230	3	0
KIF19	mRNA	3	0	0	0	0.333333	0	14	3	0
HMGA2	mRNA	3	0	0	0	0	0	75	3	0
BHMT2	mRNA	3	0	0	0	0.333333	0	148.667	3	0
STBD1	mRNA	3	0	0	0	0	0	114	3	0
LOC255167	mRNA	3	0	0	0	0	0	20	3	0
CCL19	mRNA	3	0	0	0	0.333333	0	210.333	3	0
IP6K3	mRNA	3	0	0	0	0	0	92.6667	3	0
miR656	miRNA	3	1	2.37e-06	1	0	1	7	1	2
CLEC2D	mRNA	3	0	0	0	1	0	261.333	3	0
ITGB3	mRNA	3	0	0	0	0.166667	0	15	3	0
TPM1	mRNA	3	0	0	0	0	0	104	3	0
C2orf85	mRNA	3	0	0	0	1	0	240.333	3	0
NLRC5	mRNA	3	0	0	0	1	0	178.667	3	0
PFKFB1	mRNA	3	0	0	0	0	0	182.333	3	0
miR658	miRNA	3	1	0	1	0	1	2	0	3
CPLX3	mRNA	3	0	0	0	0	0	16.3333	3	0
VWF	mRNA	3	0	0	0	0	0	198.667	3	0
MYH3	mRNA	3	0	0	0	0	0	107	3	0
GPAM	mRNA	3	0	0	0	0.333333	0	167.333	3	0
POU2AF1	mRNA	3	0	0	0	0.333333	0	146	3	0
LIMS2	mRNA	3	0	0	0	0	0	180	3	0
KIAA1797	mRNA	3	0	0	0	0	0	6.33333	3	0
BMP1	mRNA	3	0	0	0	0.333333	0	31	3	0
SLC2A4	mRNA	3	0	0	0	0	0	159.333	3	0
CLEC7A	mRNA	3	0	0	0	0.333333	0	11.3333	3	0
CYP3A7	mRNA	3	0	0	0	0.166667	0	8.66667	3	0
MAGEC3	mRNA	3	0	0	0	0.166667	0	10	3	0
CIITA	mRNA	3	0	0	0	1	0	261.333	3	0
ARHGAP30	mRNA	3	0	0	0	1	0	240.333	3	0
ACACB	mRNA	3	0	0	0	0	0	143	3	0
IL12RB1	mRNA	3	0	0	0	1	0	261.333	3	0
TPSD1	mRNA	3	0	0	0	0	0	25.3333	3	0
CPB2	mRNA	3	0	0	0	0.166667	0	39.6667	3	0
COLEC11	mRNA	3	0	0	0	0.333333	0	46.3333	3	0
CD6	mRNA	3	0	0	0	1	0	261.333	3	0
ANO4	mRNA	3	0	0	0	0	0	59.6667	3	0
miR4791	miRNA	3	1	0	1	0	1	3.33333	0	3
NUP107	mRNA	3	0	0	0	0.333333	0	18.3333	3	0
SEC22B	mRNA	3	0	0	0	0	0	21.3333	3	0
DCDC2B	mRNA	3	0	0	0	0	0	61.3333	3	0
C14orf49	mRNA	3	0	0	0	0.333333	0	96.6667	3	0
GYG2	mRNA	3	0	0	0	0	0	87.3333	3	0
CHD5	mRNA	3	0	0	0	0	0	15	3	0
NUPR1	mRNA	3	0	0	0	0.333333	0	22	3	0
HLA-DPA1	mRNA	3	0	0	0	1	0	261.333	3	0
SLC6A14	mRNA	3	0	0	0	0	0	10.3333	3	0
FST	mRNA	3	0	0	0	0	0	17	3	0
DCUN1D3	mRNA	3	0	0	0	0.333333	0	215	3	0
TAGAP	mRNA	3	0	0	0	1	0	227.667	3	0
FAM171A1	mRNA	3	0	0	0	0.666667	0	67	3	0
TFAP2E	mRNA	3	0	0	0	0.333333	0	21.3333	3	0
C21orf34	mRNA	3	0	0	0	0.333333	0	83.6667	3	0
KIR2DL1	mRNA	3	0	0	0	0	0	26.3333	3	0
RORB	mRNA	3	0	0	0	0	0	12.3333	3	0
NMT2	mRNA	3	0	0	0	0	0	187.667	3	0
SCRT1	mRNA	3	0	0	0	0	0	12.3333	3	0
CAV1	mRNA	3	0	0	0	0	0	139.667	3	0
miR636	miRNA	3	1	0	1	0	1	3.66667	0	3
CIDEC	mRNA	3	0	0	0	0.666667	0	122.667	3	0
HES7	mRNA	3	0	0	0	0.333333	0	67.6667	3	0
MEF2C	mRNA	3	0	0	0	0	0	123.333	3	0
C1orf61	mRNA	3	0	0	0	0.333333	0	10.6667	3	0
CDC25A	mRNA	3	0	0	0	0.333333	0	47	3	0
SYNPO	mRNA	3	0	0	0	0	0	181.333	3	0
FIGF	mRNA	3	0	0	0	0	0	150.333	3	0
MYCT1	mRNA	3	0	0	0	0	0	190.333	3	0
GYS1	mRNA	3	0	0	0	0.333333	0	103.667	3	0
LRRC7	mRNA	3	0	0	0	0	0	21	3	0
PIK3CD	mRNA	3	0	0	0	1	0	261.333	3	0
SLC9A3	mRNA	3	0	0	0	0	0	47.3333	3	0
DPYS	mRNA	3	0	0	0	0.333333	0	39	3	0
TMIGD2	mRNA	3	0	0	0	1	0	261.333	3	0
CEACAM7	mRNA	3	0	0	0	0	0	21.6667	3	0
CACNG6	mRNA	3	0	0	0	0	0	10	3	0
ASB16	mRNA	3	0	0	0	0	0	110.333	3	0
ZC3H12D	mRNA	3	0	0	0	0.333333	0	130.667	3	0
RSPH1	mRNA	3	0	0	0	0	0	73.3333	3	0
APOBEC3G	mRNA	3	0	0	0	1	0	261.333	3	0
miR541	miRNA	3	1	0	1	0	1	6	0	3
GGTLC2	mRNA	3	0	0	0	0	0	63	3	0
PI3	mRNA	3	0	0	0	0	0	21.6667	3	0
DKK4	mRNA	3	0	0	0	0	0	14	3	0
GNG11	mRNA	3	0	0	0	0.333333	0	215	3	0
CEBPA	mRNA	3	0	0	0	0	0	152	3	0
GVIN1	mRNA	3	0	0	0	1	0	261.333	3	0
AKNA	mRNA	3	0	0	0	1	0	261.333	3	0
SATB1	mRNA	3	0	0	0	0	0	40.6667	3	0
BTK	mRNA	3	0	0	0	1	0	261.333	3	0
OIT3	mRNA	3	0	0	0	0	0	27.6667	3	0
BPI	mRNA	3	0	0	0	0	0	17	3	0
RAC2	mRNA	3	0	0	0	0.333333	0	216	3	0
CST7	mRNA	3	0	0	0	1	0	261.333	3	0
USP49	mRNA	3	0	0	0	0.333333	0	18.6667	3	0
CPM	mRNA	3	0	0	0	0	0	128.333	3	0
NKAIN4	mRNA	3	0	0	0	0	0	60	3	0
LCP1	mRNA	3	0	0	0	1	0	261.333	3	0
LRGUK	mRNA	3	0	0	0	0	0	22	3	0
FBXW10	mRNA	3	0	0	0	0	0	8.33333	3	0
PEAR1	mRNA	3	0	0	0	0	0	198	3	0
TMC8	mRNA	3	0	0	0	0.333333	0	214	3	0
SIAH3	mRNA	3	0	0	0	0	0	20.6667	3	0
TRIM67	mRNA	3	0	0	0	0	0	14.3333	3	0
TRAF1	mRNA	3	0	0	0	1	0	227.667	3	0
miR4461	miRNA	3	1	0	1	0	1	2.66667	0	3
BEST3	mRNA	3	0	0	0	0.333333	0	69.6667	3	0
GCNT3	mRNA	3	0	0	0	0	0	42.3333	3	0
KLRC3	mRNA	3	0	0	0	0	0	9.66667	3	0
ABCA9	mRNA	3	0	0	0	0	0	180	3	0
AKR1B15	mRNA	3	0	0	0	0	0	47	3	0
TOLLIP	mRNA	3	0	0	0	0	0	21.6667	3	0
CCR4	mRNA	3	0	0	0	1	0	240.333	3	0
OSTBETA	mRNA	3	0	0	0	0	0	60	3	0
FAM181B	mRNA	3	0	0	0	0	0	11	3	0
DRD1	mRNA	3	0	0	0	0	0	20	3	0
AMY2B	mRNA	3	0	0	0	0.333333	0	15.3333	3	0
TMEM190	mRNA	3	0	0	0	0	0	26.6667	3	0
ADRA1D	mRNA	3	0	0	0	0	0	26	3	0
TUBA4B	mRNA	3	0	0	0	0	0	73.3333	3	0
FLJ12825	mRNA	3	0	0	0	1	0	34.3333	3	0
C11orf87	mRNA	3	0	0	0	0	0	9.66667	3	0
MYL4	mRNA	3	0	0	0	0	0	24.6667	3	0
GPSM3	mRNA	3	0	0	0	1	0	240.333	3	0
2019-09-01	mRNA	3	0	0	0	1	0	261.333	3	0
PDE3B	mRNA	3	0	0	0	0	0	128	3	0
LCN2	mRNA	3	0	0	0	0	0	19.3333	3	0
ATG2A	mRNA	3	0	0	0	0	0	39.3333	3	0
FAM81B	mRNA	3	0	0	0	0	0	73.3333	3	0
CA2	mRNA	3	0	0	0	0	0	48.6667	3	0
NUP210L	mRNA	3	0	0	0	0	0	9	3	0
TRAF3IP3	mRNA	3	0	0	0	1	0	227.667	3	0
AQPEP	mRNA	3	0	0	0	0	0	198.667	3	0
TTLL4	mRNA	3	0	0	0	0.333333	0	57.6667	3	0
FAM166B	mRNA	3	0	0	0	0	0	132.333	3	0
C1orf192	mRNA	3	0	0	0	0	0	73.3333	3	0
C11orf90	mRNA	3	0	0	0	0.333333	0	16.6667	3	0
C14orf180	mRNA	3	0	0	0	0.333333	0	190	3	0
IL12B	mRNA	3	0	0	0	1	0	227.667	3	0
CORO1A	mRNA	3	0	0	0	1	0	261.333	3	0
LOC644172	mRNA	3	0	0	0	0	0	43.6667	3	0
ARHGAP25	mRNA	3	0	0	0	1	0	261.333	3	0
PDZD2	mRNA	3	0	0	0	0.166667	0	207	3	0
RAPSN	mRNA	3	0	0	0	0	0	176.667	3	0
KBTBD2	mRNA	3	0	0	0	1	0	6	3	0
GPR15	mRNA	3	0	0	0	0	0	132.333	3	0
DMP1	mRNA	3	0	0	0	0.333333	0	28	3	0
SELL	mRNA	3	0	0	0	0	0	64.6667	3	0
ATP6V1B2	mRNA	3	0	0	0	0.166667	0	15	3	0
ADCYAP1R1	mRNA	3	0	0	0	0.333333	0	18	3	0
ZNF80	mRNA	3	0	0	0	1	0	261.333	3	0
B4GALNT2	mRNA	3	0	0	0	0	0	14.6667	3	0
ADRB2	mRNA	3	0	0	0	0.166667	0	190	3	0
GPR183	mRNA	3	0	0	0	1	0	261.333	3	0
FCAMR	mRNA	3	0	0	0	0	0	25.3333	3	0
PCTP	mRNA	3	0	0	0	0	0	11.6667	3	0
HOXC13	mRNA	3	0	0	0	1	0	34.3333	3	0
VIL1	mRNA	3	0	0	0	0	0	9	3	0
CCBE1	mRNA	3	0	0	0	0	0	42.3333	3	0
MUC4	mRNA	3	0	0	0	0	0	33.3333	3	0
DNAH17	mRNA	3	0	0	0	0	0	8	3	0
CD3D	mRNA	3	0	0	0	1	0	261.333	3	0
CTSW	mRNA	3	0	0	0	1	0	203	3	0
KCTD4	mRNA	3	0	0	0	0	0	68.6667	3	0
RASGRP2	mRNA	3	0	0	0	0	0	132.667	3	0
C1QTNF7	mRNA	3	0	0	0	0.166667	0	207	3	0
miR627	miRNA	3	1	0	1	0	1	4.66667	0	3
GPR174	mRNA	3	0	0	0	1	0	203	3	0
C2CD4A	mRNA	3	0	0	0	0	0	7.33333	3	0
HS3ST5	mRNA	3	0	0	0	0	0	28.3333	3	0
PLAT	mRNA	3	0	0	0	1	0	13.3333	3	0
DPT	mRNA	3	0	0	0	0.166667	0	170.667	3	0
C9orf171	mRNA	3	0	0	0	0	0	61.6667	3	0
INSRR	mRNA	3	0	0	0	0	0	21	3	0
SAMSN1	mRNA	3	0	0	0	0.666667	0	168	3	0
ZNF831	mRNA	3	0	0	0	1	0	261.333	3	0
BNC1	mRNA	3	0	0	0	0	0	49.3333	3	0
miR1288	miRNA	3	1	0	1	0	1	5.33333	0	3
LGI1	mRNA	3	0	0	0	0.333333	0	24	3	0
SPEG	mRNA	3	0	0	0	0	0	83.3333	3	0
IL18RAP	mRNA	3	0	0	0	1	0	261.333	3	0
PRKCQ	mRNA	3	0	0	0	0	0	109	3	0
TEX19	mRNA	3	0	0	0	0	0	25.6667	3	0
DEFB132	mRNA	3	0	0	0	0.166667	0	144	3	0
NCRNA00162	mRNA	3	0	0	0	0	0	23.6667	3	0
BUB3	mRNA	3	0	0	0	0	0	34.3333	3	0
SCML4	mRNA	3	0	0	0	1	0	203	3	0
SNTN	mRNA	3	0	0	0	0	0	73.3333	3	0
NECAB2	mRNA	3	0	0	0	0	0	15.6667	3	0
C5orf49	mRNA	3	0	0	0	0	0	73.3333	3	0
KIAA0408	mRNA	3	0	0	0	0.333333	0	150.333	3	0
ABCG5	mRNA	3	0	0	0	0	0	32.6667	3	0
GLB1L3	mRNA	3	0	0	0	0	0	9.33333	3	0
RPL7L1	mRNA	3	0	0	0	0	0	33.6667	3	0
POU5F1B	mRNA	3	0	0	0	0	0	21.3333	3	0
SAMD3	mRNA	3	0	0	0	1	0	261.333	3	0
SNCB	mRNA	3	0	0	0	0	0	25.6667	3	0
CD37	mRNA	3	0	0	0	0.333333	0	216	3	0
CHRNA1	mRNA	3	0	0	0	0	0	108.333	3	0
POU4F3	mRNA	3	0	0	0	0.333333	0	19.3333	3	0
PENK	mRNA	3	0	0	0	0	0	40.6667	3	0
KLRK1	mRNA	3	0	0	0	1	0	203	3	0
TRAT1	mRNA	3	0	0	0	1	0	261.333	3	0
LOC283392	mRNA	3	0	0	0	0	0	182.333	3	0
NOS2	mRNA	3	0	0	0	0	0	7.66667	3	0
C22orf15	mRNA	3	0	0	0	0	0	60.6667	3	0
CD247	mRNA	3	0	0	0	1	0	261.333	3	0
HTR7	mRNA	3	0	0	0	0	0	24.6667	3	0
CDH15	mRNA	3	0	0	0	0	0	16.6667	3	0
ATP1A1	mRNA	3	0	0	0	0.333333	0	25.3333	3	0
CDRT1	mRNA	3	0	0	0	0	0	9.66667	3	0
LOC100132111	mRNA	3	0	0	0	0.166667	0	14.6667	3	0
DGKI	mRNA	3	0	0	0	0	0	25	3	0
SLC3A1	mRNA	3	0	0	0	0.166667	0	11.6667	3	0
CTSK	mRNA	3	0	0	0	0	0	18.3333	3	0
RYR2	mRNA	3	0	0	0	0	0	8.66667	3	0
P2RY8	mRNA	3	0	0	0	1	0	261.333	3	0
C6orf81	mRNA	3	0	0	0	0	0	41.3333	3	0
RSPH4A	mRNA	3	0	0	0	0	0	73.3333	3	0
LXN	mRNA	3	0	0	0	0	0	16	3	0
PRPH	mRNA	3	0	0	0	0	0	17	3	0
ROBO4	mRNA	3	0	0	0	0	0	175	3	0
YJEFN3	mRNA	3	0	0	0	0	0	40.6667	3	0
BAI3	mRNA	3	0	0	0	0	0	53	3	0
LCK	mRNA	3	0	0	0	1	0	261.333	3	0
CDH17	mRNA	3	0	0	0	0	0	7.66667	3	0
SLC45A2	mRNA	3	0	0	0	0	0	50.3333	3	0
PPEF1	mRNA	3	0	0	0	0	0	25.3333	3	0
C11orf66	mRNA	3	0	0	0	0	0	60.6667	3	0
TMC1	mRNA	3	0	0	0	0	0	23	3	0
C7orf57	mRNA	3	0	0	0	0	0	73.3333	3	0
THEM5	mRNA	3	0	0	0	0.333333	0	11.3333	3	0
HRNBP3	mRNA	3	0	0	0	0	0	10	3	0
FAM65B	mRNA	3	0	0	0	0	0	132.667	3	0
HTR3A	mRNA	3	0	0	0	0	0	28	3	0
LY6H	mRNA	3	0	0	0	0	0	37.3333	3	0
CHGA	mRNA	3	0	0	0	0.333333	0	28.3333	3	0
JAK3	mRNA	3	0	0	0	1	0	261.333	3	0
PLAC8	mRNA	3	0	0	0	1	0	240.333	3	0
HOXC4	mRNA	3	0	0	0	1	0	34.3333	3	0
HOXC11	mRNA	3	0	0	0	1	0	34.3333	3	0
MTCP1NB	mRNA	3	0	0	0	0	0	21.6667	3	0
TTC29	mRNA	3	0	0	0	0	0	60.6667	3	0
NT5C1B	mRNA	3	0	0	0	0	0	18.6667	3	0
SLITRK1	mRNA	3	0	0	0	0.333333	0	17	3	0
MT1G	mRNA	3	0	0	0	0.333333	0	37.6667	3	0
IL1R2	mRNA	3	0	0	0	0	0	7.66667	3	0
miR1258	miRNA	3	1	0	1	0	1	5.33333	0	3
MORN5	mRNA	3	0	0	0	0.333333	0	32.3333	3	0
GPX2	mRNA	3	0	0	0	0	0	24	3	0
SLC7A11	mRNA	3	0	0	0	0	0	18.6667	3	0
HOXC10	mRNA	3	0	0	0	1	0	34.3333	3	0
HOXB7	mRNA	2	0	0	0	0	0	33	2	0
FLJ41941	mRNA	2	0	0	0	0	0	105.5	2	0
PCDH11X	mRNA	2	0	0	0	0	0	13	2	0
ACSM3	mRNA	2	0	0	0	0	0	52	2	0
PLK1	mRNA	2	0	0	0	1	0	52.5	2	0
MTDH	mRNA	2	0	0	0	0	0	29.5	2	0
C4BPB	mRNA	2	0	0	0	0	0	31.5	2	0
MAP7D3	mRNA	2	0	0	0	1	0	80	2	0
NRP1	mRNA	2	0	0	0	0	0	257.5	2	0
PRSS12	mRNA	2	0	0	0	0	0	12	2	0
XPO4	mRNA	2	0	0	0	0	0	145	2	0
KLK4	mRNA	2	0	0	0	0	0	34	2	0
miR340	miRNA	2	1	0	1	0	1	4	0	2
PLTP	mRNA	2	0	0	0	0	0	23	2	0
KCNN2	mRNA	2	0	0	0	0	0	18	2	0
MRAS	mRNA	2	0	0	0	0.5	0	245.5	2	0
C7orf61	mRNA	2	0	0	0	0	0	165.5	2	0
SLCO5A1	mRNA	2	0	0	0	0	0	134.5	2	0
TCF7	mRNA	2	0	0	0	0	0	180.5	2	0
FAM64A	mRNA	2	0	0	0	1	0	31	2	0
EEPD1	mRNA	2	0	0	0	0	0	96	2	0
C8orf80	mRNA	2	0	0	0	0	0	180.5	2	0
SH3BGRL2	mRNA	2	0	0	0	0.5	0	245.5	2	0
ZNF384	mRNA	2	0	0	0	1	0	164.5	2	0
CCL4	mRNA	2	0	0	0	0.5	0	164.5	2	0
CTTNBP2	mRNA	2	0	0	0	0	0	19.5	2	0
TACR1	mRNA	2	0	0	0	0	0	186	2	0
COL7A1	mRNA	2	0	0	0	0	0	29.5	2	0
CCR9	mRNA	2	0	0	0	1	0	217	2	0
ST6GALNAC3	mRNA	2	0	0	0	0	0	151.5	2	0
ZNF454	mRNA	2	0	0	0	0.5	0	78	2	0
LOC90586	mRNA	2	0	0	0	0	0	216.5	2	0
TAF7L	mRNA	2	0	0	0	0	0	5	2	0
CELF3	mRNA	2	0	0	0	0	0	16	2	0
PDE1A	mRNA	2	0	0	0	0	0	116.5	2	0
LOC644538	mRNA	2	0	0	0	0	0	257.5	2	0
C1orf74	mRNA	2	0	0	0	0	0	35.5	2	0
LOC100131726	mRNA	2	0	0	0	0	0	37	2	0
RNASE7	mRNA	2	0	0	0	0	0	76	2	0
ITGA10	mRNA	2	0	0	0	0	0	32.5	2	0
miR3064	miRNA	2	1	0	1	0	1	2	0	2
NCF4	mRNA	2	0	0	0	1	0	304.5	2	0
GIMAP6	mRNA	2	0	0	0	0	0	257.5	2	0
HDAC2	mRNA	2	0	0	0	1	0	52.5	2	0
TSHR	mRNA	2	0	0	0	0	0	3	2	0
IFI30	mRNA	2	0	0	0	1	0	231	2	0
PIP	mRNA	2	0	0	0	0	0	22	2	0
TRPC4	mRNA	2	0	0	0	0	0	17.5	2	0
GPR116	mRNA	2	0	0	0	0.5	0	119	2	0
LPPR4	mRNA	2	0	0	0	0	0	14.5	2	0
GPR109B	mRNA	2	0	0	0	0	0	198.5	2	0
RAGE	mRNA	2	0	0	0	0	0	11.5	2	0
ZNHIT6	mRNA	2	0	0	0	0	0	31	2	0
HOXA11AS	mRNA	2	0	0	0	0	0	10.5	2	0
HSPB2	mRNA	2	0	0	0	0	0	7	2	0
GRIN2D	mRNA	2	0	0	0	0	0	7.5	2	0
PDCD1LG2	mRNA	2	0	0	0	0.5	0	164.5	2	0
BANK1	mRNA	2	0	0	0	0	0	32	2	0
GLDN	mRNA	2	0	0	0	0	0	70	2	0
CARD11	mRNA	2	0	0	0	1	0	231	2	0
SCARNA10	mRNA	2	0	0	0	0	0	18.5	2	0
TFDP1	mRNA	2	0	0	0	1	0	29.5	2	0
BAALC	mRNA	2	0	0	0	0	0	29.5	2	0
DENND2A	mRNA	2	0	0	0	0	0	223	2	0
FGFBP1	mRNA	2	0	0	0	0	0	54.5	2	0
AGFG2	mRNA	2	0	0	0	1	0	31.5	2	0
PKD1L2	mRNA	2	0	0	0	0	0	96.5	2	0
SFT2D2	mRNA	2	0	0	0	1	0	57	2	0
ACYP2	mRNA	2	0	0	0	0	0	110	2	0
AQP1	mRNA	2	0	0	0	0	0	170.5	2	0
FOLR2	mRNA	2	0	0	0	0	0	25	2	0
ATL2	mRNA	2	0	0	0	1	0	71	2	0
DLK2	mRNA	2	0	0	0	0	0	75	2	0
ZBED2	mRNA	2	0	0	0	1	0	231	2	0
ICAM3	mRNA	2	0	0	0	1	0	231	2	0
CCDC46	mRNA	2	0	0	0	0	0	223	2	0
ARHGAP10	mRNA	2	0	0	0	0	0	257.5	2	0
PDGFD	mRNA	2	0	0	0	0	0	115.5	2	0
TAF5	mRNA	2	0	0	0	1	0	52.5	2	0
SAMHD1	mRNA	2	0	0	0	0	0	182	2	0
FOLH1B	mRNA	2	0	0	0	0	0	19.5	2	0
NGFR	mRNA	2	0	0	0	0	0	34	2	0
TYRP1	mRNA	2	0	0	0	0	0	50.5	2	0
EGFR	mRNA	2	0	0	0	0	0	29.5	2	0
NDC80	mRNA	2	0	0	0	0	0	41	2	0
EN1	mRNA	2	0	0	0	1	0	57	2	0
TNFAIP3	mRNA	2	0	0	0	1	0	304.5	2	0
EIF3K	mRNA	2	0	0	0	0	0	102.5	2	0
BMP3	mRNA	2	0	0	0	0	0	91	2	0
CCDC88B	mRNA	2	0	0	0	0	0	180.5	2	0
C10orf88	mRNA	2	0	0	0	0	0	52	2	0
STK4	mRNA	2	0	0	0	1	0	217	2	0
B3GNT5	mRNA	2	0	0	0	0.5	0	78	2	0
TWIST1	mRNA	2	0	0	0	1	0	20	2	0
ANKRD50	mRNA	2	0	0	0	0	0	31	2	0
ACSS2	mRNA	2	0	0	0	0	0	216.5	2	0
FCRL6	mRNA	2	0	0	0	1	0	248.5	2	0
GGTA1	mRNA	2	0	0	0	0	0	104.5	2	0
PNPLA6	mRNA	2	0	0	0	1	0	22	2	0
MCAM	mRNA	2	0	0	0	0	0	59	2	0
NOX4	mRNA	2	0	0	0	1	0	71	2	0
P4HA2	mRNA	2	0	0	0	0	0	26	2	0
CHRNB2	mRNA	2	0	0	0	1	0	18.5	2	0
miR3940	miRNA	2	1	0	1	0	1	6.5	0	2
C3orf70	mRNA	2	0	0	0	0	0	10	2	0
KLK13	mRNA	2	0	0	0	0	0	10	2	0
C2orf84	mRNA	2	0	0	0	0.5	0	197.5	2	0
TWISTNB	mRNA	2	0	0	0	0	0	11.5	2	0
LOC400804	mRNA	2	0	0	0	0	0	9	2	0
FTSJ1	mRNA	2	0	0	0	1	0	19.5	2	0
CDCA8	mRNA	2	0	0	0	1	0	52.5	2	0
TNFAIP8L2	mRNA	2	0	0	0	0.5	0	149.5	2	0
SILV	mRNA	2	0	0	0	0	0	14	2	0
PTPRB	mRNA	2	0	0	0	0	0	186	2	0
ASXL3	mRNA	2	0	0	0	0	0	57	2	0
SCGB2A2	mRNA	2	0	0	0	0	0	37.5	2	0
ST7	mRNA	2	0	0	0	0	0	15.5	2	0
PIK3CG	mRNA	2	0	0	0	1	0	304.5	2	0
AGRP	mRNA	2	0	0	0	0	0	30.5	2	0
CCNA1	mRNA	2	0	0	0	0	0	42.5	2	0
ABCC4	mRNA	2	0	0	0	0	0	28	2	0
SCN9A	mRNA	2	0	0	0	0.5	0	119	2	0
KLF4	mRNA	2	0	0	0	0	0	198.5	2	0
SERPINB9	mRNA	2	0	0	0	1	0	217	2	0
DCAF13	mRNA	2	0	0	0	0	0	35	2	0
ATOH8	mRNA	2	0	0	0	0	0	257.5	2	0
SCRG1	mRNA	2	0	0	0	0	0	14.5	2	0
SPRY1	mRNA	2	0	0	0	0	0	175	2	0
CCDC147	mRNA	2	0	0	0	0	0	8	2	0
OGDH	mRNA	2	0	0	0	0	0	108	2	0
NRN1	mRNA	2	0	0	0	0	0	80	2	0
CARD16	mRNA	2	0	0	0	0	0	16	2	0
PCOLCE	mRNA	2	0	0	0	0	0	23	2	0
FLJ39653	mRNA	2	0	0	0	0	0	21.5	2	0
UQCRFS1	mRNA	2	0	0	0	0	0	16.5	2	0
CDCA7	mRNA	2	0	0	0	0	0	47.5	2	0
ASF1B	mRNA	2	0	0	0	0	0	20	2	0
CD244	mRNA	2	0	0	0	1	0	231	2	0
miR374b	miRNA	2	1	0	1	0	1	4	0	2
PIWIL1	mRNA	2	0	0	0	0	0	17.5	2	0
PGM1	mRNA	2	0	0	0	0	0	145	2	0
MUC13	mRNA	2	0	0	0	0	0	10.5	2	0
PAK3	mRNA	2	0	0	0	1	0	34	2	0
FAM196B	mRNA	2	0	0	0	0	0	30.5	2	0
MRC1	mRNA	2	0	0	0	0	0	9	2	0
HLA-G	mRNA	2	0	0	0	0	0	26.5	2	0
ESR2	mRNA	2	0	0	0	0	0	140	2	0
VAMP3	mRNA	2	0	0	0	0	0	187	2	0
LAMB4	mRNA	2	0	0	0	0	0	21	2	0
CDCA3	mRNA	2	0	0	0	1	0	52.5	2	0
DBF4	mRNA	2	0	0	0	0	0	47.5	2	0
CABYR	mRNA	2	0	0	0	0	0	34.5	2	0
IFNG	mRNA	2	0	0	0	1	0	199.5	2	0
ETFDH	mRNA	2	0	0	0	0	0	187	2	0
miR3136	miRNA	2	1	0	1	0	1	3.5	0	2
NANOS1	mRNA	2	0	0	0	0	0	15.5	2	0
SLC35D3	mRNA	2	0	0	0	0	0	21	2	0
MDM2	mRNA	2	0	0	0	0	0	15	2	0
TUBB3	mRNA	2	0	0	0	0	0	54.5	2	0
GABARAPL1	mRNA	2	0	0	0	0.5	0	245.5	2	0
SFRS13B	mRNA	2	0	0	0	1	0	54.5	2	0
FLJ10357	mRNA	2	0	0	0	0	0	104.5	2	0
SFTA1P	mRNA	2	0	0	0	0	0	83	2	0
FYCO1	mRNA	2	0	0	0	0	0	99.5	2	0
MEOX1	mRNA	2	0	0	0	0	0	257.5	2	0
AGBL4	mRNA	2	0	0	0	0	0	17.5	2	0
SUMF2	mRNA	2	0	0	0	0	0	8.5	2	0
C10orf128	mRNA	2	0	0	0	0	0	257.5	2	0
PRNP	mRNA	2	0	0	0	0.5	0	43.5	2	0
TNFSF15	mRNA	2	0	0	0	0	0	6.5	2	0
C9orf24	mRNA	2	0	0	0	0	0	45.5	2	0
GUSBP1	mRNA	2	0	0	0	0	0	9.5	2	0
THEMIS	mRNA	2	0	0	0	1	0	248.5	2	0
HAR1A	mRNA	2	0	0	0	0	0	32	2	0
CAMK1	mRNA	2	0	0	0	0	0	257.5	2	0
TGFBR3	mRNA	2	0	0	0	0	0	115.5	2	0
PHGDH	mRNA	2	0	0	0	0	0	21.5	2	0
HDGF	mRNA	2	0	0	0	1	0	52.5	2	0
FGF1	mRNA	2	0	0	0	0	0	41	2	0
GDF10	mRNA	2	0	0	0	0	0	15.5	2	0
PKHD1	mRNA	2	0	0	0	0	0	19	2	0
AOC2	mRNA	2	0	0	0	0	0	139	2	0
PIK3AP1	mRNA	2	0	0	0	1	0	199.5	2	0
TWIST2	mRNA	2	0	0	0	0	0	104.5	2	0
WISP1	mRNA	2	0	0	0	0	0	18	2	0
MOSC1	mRNA	2	0	0	0	0	0	96	2	0
EZH1	mRNA	2	0	0	0	0.5	0	245.5	2	0
FGF19	mRNA	2	0	0	0	0	0	6	2	0
SCG2	mRNA	2	0	0	0	0	0	23	2	0
RNF150	mRNA	2	0	0	0	0	0	187	2	0
C10orf79	mRNA	2	0	0	0	0	0	81.5	2	0
IGFN1	mRNA	2	0	0	0	0	0	108	2	0
LOC399959	mRNA	2	0	0	0	1	0	21	2	0
IGSF1	mRNA	2	0	0	0	0	0	39	2	0
FAM69C	mRNA	2	0	0	0	1	0	19.5	2	0
CFTR	mRNA	2	0	0	0	0	0	10.5	2	0
PPP1R16B	mRNA	2	0	0	0	0	0	319	2	0
SCT	mRNA	2	0	0	0	0	0	96	2	0
KLHDC8A	mRNA	2	0	0	0	0	0	7.5	2	0
FGD2	mRNA	2	0	0	0	1	0	248.5	2	0
MTMR10	mRNA	2	0	0	0	0.5	0	245.5	2	0
ACAN	mRNA	2	0	0	0	0	0	8	2	0
GPR65	mRNA	2	0	0	0	1	0	199.5	2	0
BMP5	mRNA	2	0	0	0	0	0	12	2	0
C8orf76	mRNA	2	0	0	0	0	0	35	2	0
SFTPD	mRNA	2	0	0	0	0	0	10	2	0
ATP6V1C1	mRNA	2	0	0	0	1	0	25	2	0
MME	mRNA	2	0	0	0	0	0	170.5	2	0
PREX2	mRNA	2	0	0	0	0	0	187	2	0
LRP1	mRNA	2	0	0	0	1	0	164.5	2	0
RFPL2	mRNA	2	0	0	0	0	0	2.5	2	0
MXRA8	mRNA	2	0	0	0	1	0	35	2	0
KIF21B	mRNA	2	0	0	0	1	0	217	2	0
S100A8	mRNA	2	0	0	0	0	0	70.5	2	0
CHIT1	mRNA	2	0	0	0	0	0	35	2	0
FAM159A	mRNA	2	0	0	0	0	0	179.5	2	0
BSN	mRNA	2	0	0	0	0	0	18.5	2	0
NKAPL	mRNA	2	0	0	0	0	0	257.5	2	0
TNNT2	mRNA	2	0	0	0	0	0	148.5	2	0
TAF4B	mRNA	2	0	0	0	1	0	71	2	0
KRT9	mRNA	2	0	0	0	0	0	12	2	0
LOC283663	mRNA	2	0	0	0	0	0	37.5	2	0
XRRA1	mRNA	2	0	0	0	0	0	16.5	2	0
C1orf230	mRNA	2	0	0	0	0	0	20	2	0
CDHR4	mRNA	2	0	0	0	0	0	62.5	2	0
CCDC160	mRNA	2	0	0	0	1	0	15	2	0
FOXN1	mRNA	2	0	0	0	0	0	26	2	0
CES1	mRNA	2	0	0	0	0	0	162	2	0
RASSF2	mRNA	2	0	0	0	1	0	248.5	2	0
MOBKL2B	mRNA	2	0	0	0	0.5	0	78	2	0
UTS2D	mRNA	2	0	0	0	0	0	174	2	0
GIPC2	mRNA	2	0	0	0	0	0	186	2	0
CIB1	mRNA	2	0	0	0	0	0	17	2	0
KIF2C	mRNA	2	0	0	0	1	0	31	2	0
MEOX2	mRNA	2	0	0	0	0	0	257.5	2	0
OR1L8	mRNA	2	0	0	0	0	0	20	2	0
LOC100130557	mRNA	2	0	0	0	0	0	28	2	0
LOXHD1	mRNA	2	0	0	0	0	0	7	2	0
[truncated: 2,252 more rows]
